# Supplementary material for: Metal-free three-component assemblies of anilines, α-keto acids and alkyl lactates for quinoline synthesis and their anti-inflammatory activity
Source: Royal Society of Chemistry journal article supplement (doi:10.1039/d2ob00661h), 2022-01-01
Supplement: d2ob00661h1.pdf [file d2ob00661h1.pdf]

# Metal-free three-component assemblies of anilines, $\alpha$ -keto acids and alkyl lactates for quinoline synthesis and their anti-inflammatory activity

Lizhu Huang,<sup>a</sup> Lu Yang,<sup>a</sup> Jie-Ping Wan,<sup>a</sup> Liyun Zhou,<sup>\*a</sup> Yunyun Liu,<sup>\*a</sup> and Guifeng Hao<sup>\*b</sup>

<sup>a</sup>College of Chemistry and Chemical Engineering, Jiangxi Normal University, Nanchang 330022, China

<sup>b</sup>Center for General Practice Medicine, Department of Rheumatology and Immunology, Zhejiang Provincial People's Hospital (Affiliated People's Hospital, Hangzhou Medical College), Hangzhou 310014, China.

**Email:** dochgf@sina.com; zly9510@126.com; chemliuyunyun@jxnu.edu.cn

## Contents

|                                                    |         |
|----------------------------------------------------|---------|
| <b>General experimental information</b> .....      | S1      |
| <b>Characterization data of all products</b> ..... | S2-S11  |
| <b>References</b> .....                            | S11     |
| <b>NMR spectra of all products</b> .....           | S12-S35 |
| <b>The GC-MS spectra</b> .....                     | S36     |

## General experimental information

All experiments are performed under air atmosphere, and the reactions are monitored by TLC (GF254 silica gel).  $\alpha$ -oxocarboxylic acids **2** (except **2a**) are synthesized following literature procedures.<sup>1</sup> All other chemicals and reagents are obtained from commercial sources and used directly without further treatment. Solvents have been treated following standard processes prior to used. <sup>1</sup>H and <sup>13</sup>C NMR were recorded in 400 MHz apparatus. The frequencies for <sup>1</sup>H NMR and <sup>13</sup>C NMR test are 400 MHz and 100 MHz, respectively. The chemical shifts of most of compounds were reported in ppm with TMS as internal standard. Melting points were tested in X-4A instrument without correcting temperature and the HRMS were obtained under ESI model.

## Characterization data of all products

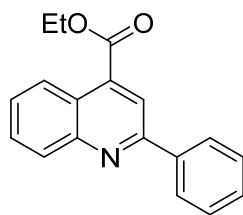

**Ethyl 2-phenylquinoline-4-carboxylate (4a).**<sup>2</sup> Eluent:  $V_{PE}/V_{EA} = 100:1$ ; Yield: 37 mg (67 %); Yellow liquid;  $^1\text{H}$  NMR (400 MHz,  $\text{CDCl}_3$ )  $\delta$  8.73 (d,  $J = 8.4$  Hz, 1H), 8.38 (s, 1H), 8.27 – 8.11 (m, 3H), 7.76 (t,  $J = 7.0$  Hz, 1H), 7.61 (t,  $J = 7.6$  Hz, 1H), 7.57 – 7.51 (m, 2H), 7.48 (d,  $J = 7.2$  Hz, 1H), 4.54 (q,  $J = 7.2$  Hz, 2H), 1.49 (t,  $J = 7.2$  Hz, 3H);  $^{13}\text{C}$  NMR (100 MHz,  $\text{CDCl}_3$ )  $\delta$  166.4, 156.7, 149.2, 138.8, 136.2, 130.3, 129.9, 129.7, 128.9, 127.7, 127.5, 125.4, 124.0, 120.2, 61.9, 14.4.

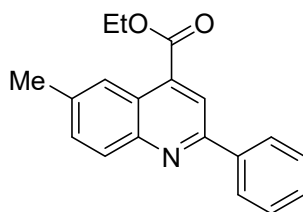

**Ethyl 6-methyl-2-phenylquinoline-4-carboxylate (4b).**<sup>2</sup> Eluent:  $V_{PE}/V_{EA} = 80:1$ ; Yield: 29 mg (50 %); Yellow solid, m.p. 76-78 °C;  $^1\text{H}$  NMR (400 MHz,  $\text{CDCl}_3$ )  $\delta$  8.50 (s, 1H), 8.33 (s, 1H), 8.18 (d,  $J = 8.0$  Hz, 2H), 8.11 (d,  $J = 8.4$  Hz, 1H), 7.59 (d,  $J = 8.4$  Hz, 1H), 7.53 (d,  $J = 7.4$  Hz, 2H), 7.47 (d,  $J = 6.0$  Hz, 1H), 4.53 (d,  $J = 7.2$  Hz, 2H), 2.57 (s, 3H), 1.49 (d,  $J = 7.2$  Hz, 3H);  $^{13}\text{C}$  NMR (100 MHz,  $\text{CDCl}_3$ )  $\delta$  166.6, 155.8, 147.8, 138.9, 137.9, 135.4, 132.2, 129.9, 129.5, 128.9, 127.4, 124.2, 124.1, 120.1, 61.8, 22.1, 14.4.

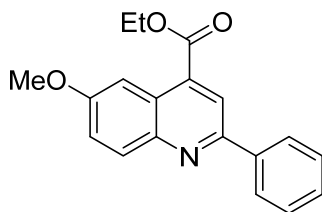

**Ethyl 6-methoxy-2-phenylquinoline-4-carboxylate (4c).**<sup>3</sup> Eluent:  $V_{PE}/V_{EA} = 50:1$ ; Yield: 18 mg (30 %); Yellow solid, m.p. 67-69 °C;  $^1\text{H}$  NMR (400 MHz,  $\text{CDCl}_3$ )  $\delta$  8.42 (s, 1H), 8.22 (s, 1H), 8.17 (d,  $J = 8.0$  Hz, 2H), 8.12 (d,  $J = 9.$

2 Hz, 1H), 7.54 (d,  $J = 7.8$  Hz, 2H), 7.47 (d,  $J = 8.4$  Hz, 1H), 7.43 (d,  $J = 10.4$  Hz, 1H), 4.53 (d,  $J = 7.2$  Hz, 2H), 3.98 (s, 3H), 1.51 (d,  $J = 7.2$  Hz, 3H);  $^{13}\text{C}$  NMR (100 MHz,  $\text{CDCl}_3$ )  $\delta$  166.6, 159.0, 154.1, 145.6, 138.9, 133.9, 131.7, 129.3, 128.9, 127.2, 125.5, 122.8, 120.7, 103.3, 61.7, 55.6, 14.4.

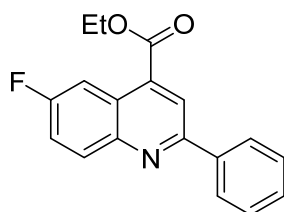

**Ethyl 6-fluoro-2-phenylquinoline-4-carboxylate (4d).**<sup>2</sup> Eluent:  $V_{\text{PE}}/V_{\text{EA}} = 100:1$ ; Yield: 20 mg (34 %); Yellow solid, m.p. 65-68 °C;  $^1\text{H}$  NMR (400 MHz,  $\text{CDCl}_3$ )  $\delta$  8.40 (dd,  $J = 10.8, 2.8$  Hz, 1H), 8.35 (s, 1H), 8.12 – 8.06 (m, 3H), 7.47 – 7.38 (m, 4H), 4.44 (d,  $J = 7.2$  Hz, 2H), 1.41 (d,  $J = 7.2$  Hz, 3H);  $^{13}\text{C}$  NMR (100 MHz,  $\text{CDCl}_3$ )  $\delta$  166.0, 162.6 – 160.2(d,  $J_{\text{C-F}} = 247.1$  Hz), 156.1, 146.5, 138.5, 135.1–135.0(d,  $J_{\text{C-F}} = 6.0$  Hz), 132.7–132.6(d,  $J_{\text{C-F}} = 9.3$  Hz), 129.8, 129.0, 127.4, 125.0 – 124.9(d,  $J_{\text{C-F}} = 11.0$  Hz), 121.1, 120.3 – 120.0 (d,  $J_{\text{C-F}} = 25.9$  Hz), 109.7 – 109.4(d,  $J_{\text{C-F}} = 24.9$  Hz), 62.0, 14.3.

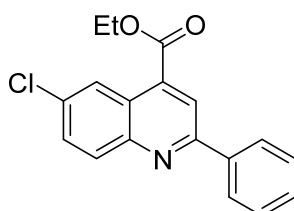

**Ethyl 6-chloro-2-phenylquinoline-4-carboxylate (4e).**<sup>3</sup> Eluent:  $V_{\text{PE}}/V_{\text{EA}} = 100:1$ ; Yield: 29 mg (47 %); Yellow solid, m.p. 78-80 °C;  $^1\text{H}$  NMR (400 MHz,  $\text{CDCl}_3$ )  $\delta$  8.83 (s, 1H), 8.44 (s, 1H), 8.23 – 8.12 (m, 3H), 7.70 (d,  $J = 9.0$  Hz, 1H), 7.58 – 7.48 (m, 3H), 4.55 (d,  $J = 7.2$  Hz, 2H), 1.51 (d,  $J = 7.2$  Hz, 3H);  $^{13}\text{C}$  NMR (100 MHz,  $\text{CDCl}_3$ )  $\delta$  165.9, 156.9, 147.6, 138.4, 135.0, 133.9, 131.7, 130.9, 130.0, 129.0, 127.5, 124.6, 121.1, 62.1, 14.3.

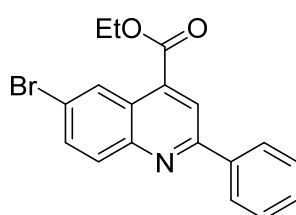

**Ethyl 6-bromo-2-phenylquinoline-4-carboxylate(4f).**<sup>3</sup> Eluent:  $V_{PE}/V_{EA} = 100:1$ ; Yield: 25 mg (35 %); Yellow solid, m.p. 100-102 °C;  $^1H$  NMR (400 MHz,  $CDCl_3$ )  $\delta$  9.00 (s, 1H), 8.42 (s, 1H), 8.19 (d,  $J = 8.0$  Hz, 2H), 8.08 (d,  $J = 8.8$  Hz, 1H), 7.83 (d,  $J = 9.2$  Hz, 1H), 7.58 – 7.47 (m, 3H), 4.55 (d,  $J = 7.2$  Hz, 2H), 1.51 (d,  $J = 7.2$  Hz, 3H);  $^{13}C$  NMR (100 MHz,  $CDCl_3$ )  $\delta$  165.8, 157.0, 147.7, 138.3, 134.9, 133.5, 131.7, 130.1, 129.0, 127.9, 127.5, 125.1, 122.3, 121.1, 62.2, 14.3.

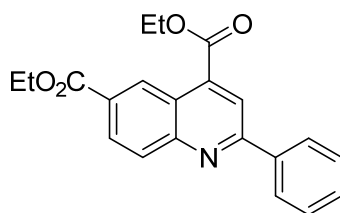

**Diethyl 2-phenylquinoline-4,6-dicarboxylate (4g).** Eluent:  $V_{PE}/V_{EA} = 25:1$ ; Yield: 38 mg (54 %); Yellow solid, m.p. 100-102 °C;  $^1H$  NMR (400 MHz,  $CDCl_3$ )  $\delta$  9.48 (d,  $J = 1.6$  Hz, 1H), 8.45 (s, 1H), 8.36 (dd,  $J = 8.8, 1.8$  Hz, 1H), 8.25 (t,  $J = 10.0, 8.0$  Hz, 3H), 7.61 – 7.52 (m, 3H), 4.59 (q,  $J = 7.2$  Hz, 2H), 4.47 (q,  $J = 7.2$  Hz, 2H), 1.54 (t,  $J = 7.2$  Hz, 3H), 1.47 (t,  $J = 7.2$  Hz, 3H);  $^{13}C$  NMR (100 MHz,  $CDCl_3$ )  $\delta$  166.3, 166.0, 158.7, 150.9, 138.3, 137.4, 130.4, 130.3, 129.5, 129.3, 129.0, 128.6, 127.7, 123.2, 120.9, 77.3, 77.0, 76.7, 62.2, 61.4, 14.4, 14.3; HRMS (ESI-TOF)  $m/z$ :  $[M + H]^+$  Calcd for  $C_{21}H_{20}NO_4^+$  350.1387; Found 350.1391.

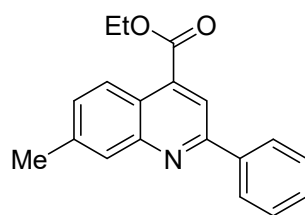

**Ethyl 7-methyl-2-phenylquinoline-4-carboxylate (4h).**<sup>3</sup> Eluent:  $V_{PE}/V_{EA} = 50:1$ ; Yield: 25 mg (43 %); Brown solid, m.p. 98-101 °C;  $^1H$  NMR (400 MHz,  $CDCl_3$ )  $\delta$  8.62 (d,  $J = 8.8$  Hz, 1H), 8.31 (s, 1H), 8.18 (d,  $J = 8.0$  Hz, 2H), 8.01 (s, 1H), 7.53 (d,  $J = 7.2$  Hz, 2H), 7.51 – 7.40 (m, 2H), 4.52 (d,  $J = 7.2$  Hz, 2H), 2.57 (s, 3H), 1.49 (d,  $J = 7.2$  Hz, 3H);  $^{13}C$  NMR (100 MHz,  $CDCl_3$ )  $\delta$  166.5, 156.6, 149.5, 140.2, 139.0, 135.8, 130.0, 129.6, 129.2, 128.9, 127.5, 125.1, 122.1, 119.4, 61.8, 21.7, 14.4.

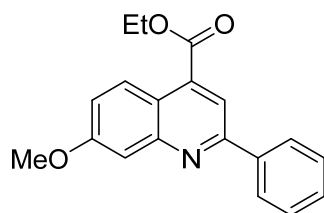

**Ethyl 7-methoxy-2-phenylquinoline-4-carboxylate (4i).**<sup>3</sup> Eluent:  $V_{PE}/V_{EA} = 50:1$ ;  
 Yield: 20 mg (33 %); Yellow solid, m.p. 83-85 °C; <sup>1</sup>H NMR (400 MHz, CDCl<sub>3</sub>)  $\delta$  8.56 (d,  $J = 9.2$  Hz, 1H), 8.15 (s, 1H), 8.09 (d,  $J = 7.2$  Hz, 2H), 7.50 – 7.43 (m, 3H), 7.40 (d,  $J = 7.2$  Hz, 1H), 7.19 (dd,  $J = 9.2, 2.6$  Hz, 1H), 4.44 (d,  $J = 7.2$  Hz, 2H), 3.90 (s, 3H), 1.41 (d,  $J = 7.2$  Hz, 3H); <sup>13</sup>C NMR (100 MHz, CDCl<sub>3</sub>)  $\delta$  166.5, 160.9, 157.1, 151.1, 138.9, 135.9, 129.6, 128.9, 127.5, 126.5, 120.9, 119.3, 118.0, 108.0, 61.9, 55.6, 14.4.

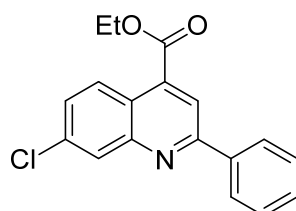

**Ethyl 7-chloro-2-phenylquinoline-4-carboxylate (4j).**<sup>3</sup> Eluent:  $V_{PE}/V_{EA} = 50:1$ ;  
 Yield: 39 mg (63 %); White solid; m.p. 89-91 °C; <sup>1</sup>H NMR (400 MHz, CDCl<sub>3</sub>)  $\delta$  8.63 (d,  $J = 9.2$  Hz, 1H), 8.28 (s, 1H), 8.15 – 8.04 (m, 3H), 7.50 – 7.35 (m, 4H), 4.45 (d,  $J = 7.2$  Hz, 2H), 1.41 (d,  $J = 7.2$  Hz, 3H); <sup>13</sup>C NMR (100 MHz, CDCl<sub>3</sub>)  $\delta$  166.0, 157.8, 149.7, 138.3, 135.9, 135.9, 130.1, 129.1, 129.0, 128.6, 127.5, 126.9, 122.5, 120.3, 62.1, 14.3.

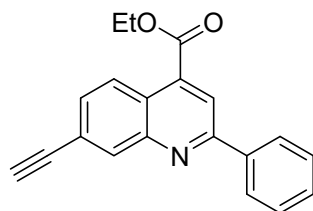

**Ethyl 7-ethynyl-2-phenylquinoline-4-carboxylate (4k).**<sup>3</sup> Eluent:  $V_{PE}/V_{EA} = 50:1$ ;  
 Yield: 17 mg (28 %); Yellow solid, m.p. 83-85 °C; <sup>1</sup>H NMR (400 MHz, CDCl<sub>3</sub>)  $\delta$  8.71 (d,  $J = 8.8$  Hz, 1H), 8.39 (s, 1H), 8.37 (s, 1H), 8.19 (d,  $J = 7.0$  Hz, 2H), 7.65 (dd,  $J = 8.8, 1.6$  Hz, 1H), 7.55 (t,  $J = 7.2$  Hz, 2H), 7.50 (d,  $J = 7.0$  Hz, 1H), 4.54 (q,  $J = 7.2$

Hz, 2H), 3.26 (s, 1H), 1.50 (t,  $J = 7.2$  Hz, 3H);  $^{13}\text{C}$  NMR (100 MHz,  $\text{CDCl}_3$ )  $\delta$  166.1, 157.5, 148.8, 138.5, 135.9, 134.2, 130.4, 130.0, 128.9, 127.5, 125.7, 124.1, 123.7, 120.7, 83.0, 79.5, 77.3, 77.0, 76.7, 62.0, 14.3.

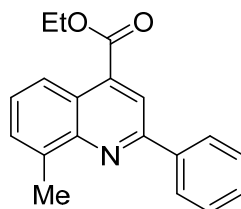

**Ethyl 8-methyl-2-phenylquinoline-4-carboxylate (4l).**<sup>4</sup> Eluent:  $V_{\text{PE}}/V_{\text{EA}} = 70:1$ ; Yield: 15 mg (26 %); Yellow liquid;  $^1\text{H}$  NMR (400 MHz,  $\text{CDCl}_3$ )  $\delta$  8.53 (d,  $J = 8.4$  Hz, 1H), 8.37 (s, 1H), 8.27 (d,  $J = 7.6$  Hz, 2H), 7.59 (d,  $J = 6.8$  Hz, 1H), 7.56 – 7.50 (m, 2H), 7.46 (d,  $J = 7.2$  Hz, 2H), 4.53 (d,  $J = 7.2$  Hz, 2H), 2.90 (s, 3H), 1.49 (d,  $J = 7.2$  Hz, 3H);  $^{13}\text{C}$  NMR (100 MHz,  $\text{CDCl}_3$ )  $\delta$  166.8, 154.8, 148.1, 139.0, 138.1, 136.5, 130.0, 129.6, 128.9, 127.5, 127.4, 124.0, 123.2, 119.3, 61.9, 18.5, 14.4.

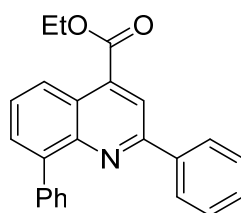

**Ethyl 2,8-diphenylquinoline-4-carboxylate (4m).** Eluent:  $V_{\text{PE}}/V_{\text{EA}} = 50:1$ ; Yield: 36 mg (54 %); Yellow solid; m.p. 96-98 °C;  $^1\text{H}$  NMR (400 MHz,  $\text{CDCl}_3$ )  $\delta$  8.62 (d,  $J = 8.6$  Hz, 1H), 8.34 (s, 1H), 8.07 (d,  $J = 7.0$  Hz, 2H), 7.75 – 7.67 (m, 3H), 7.61 – 7.55 (m, 1H), 7.43 (t,  $J = 7.6$  Hz, 2H), 7.40 – 7.30 (m, 4H), 4.47 (q,  $J = 7.0$  Hz, 2H), 1.42 (t,  $J = 7.0$  Hz, 3H);  $^{13}\text{C}$  NMR (100 MHz,  $\text{CDCl}_3$ )  $\delta$  165.7, 154.2, 145.5, 140.3, 138.6, 137.6, 135.5, 130.1, 129.6, 128.6, 127.8, 126.6, 126.4, 126.3, 126.1, 123.8, 123.3, 118.0, 60.9, 13.3; HRMS (ESI-TOF)  $m/z$ :  $[\text{M} + \text{H}]^+$  Calcd for  $\text{C}_{24}\text{H}_{20}\text{NO}_2^+$  354.1489; Found 354.1495.

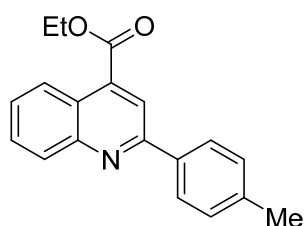

**Ethyl 2-(*p*-tolyl)quinoline-4-carboxylate (4n).**<sup>3</sup> Eluent:  $V_{PE}/V_{EA} = 100:1$ ; Yield: 24 mg (41 %); Yellow liquid;  $^1\text{H NMR}$  (400 MHz,  $\text{CDCl}_3$ )  $\delta$  8.72 (d,  $J = 8.4$  Hz, 1H), 8.36 (s, 1H), 8.22 (d,  $J = 8.4$  Hz, 1H), 8.11 (d,  $J = 8.0$  Hz, 2H), 7.75 (d,  $J = 7.6$  Hz, 1H), 7.60 (d,  $J = 7.6$  Hz, 1H), 7.34 (d,  $J = 8.0$  Hz, 2H), 4.54 (d,  $J = 7.2$  Hz, 2H), 2.43 (s, 3H), 1.49 (d,  $J = 7.2$  Hz, 3H);  $^{13}\text{C NMR}$  (100 MHz,  $\text{CDCl}_3$ )  $\delta$  166.5, 156.7, 149.2, 139.9, 136.1, 136.0, 130.2, 129.8, 129.7, 127.5, 127.4, 125.4, 123.9, 120.1, 61.9, 21.4, 14.4.

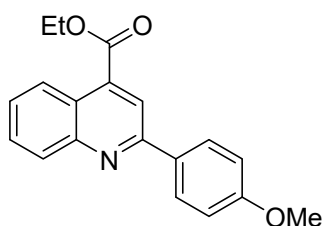

**Ethyl 2-(4-methoxyphenyl)quinoline-4-carboxylate (4o).**<sup>3</sup> Eluent:  $V_{PE}/V_{EA} = 100:1$ ; Yield: 25 mg (41 %); Yellow solid; m.p. 77-79 °C;  $^1\text{H NMR}$  (400 MHz,  $\text{CDCl}_3$ )  $\delta$  8.61 (d,  $J = 8.6$  Hz, 1H), 8.24 (s, 1H), 8.14 – 8.04 (m, 3H), 7.65 (t,  $J = 7.6$  Hz, 1H), 7.49 (t,  $J = 7.8$  Hz, 1H), 6.96 (d,  $J = 8.4$  Hz, 2H), 4.45 (q,  $J = 7.2$  Hz, 2H), 3.79 (s, 3H), 1.41 (t,  $J = 7.2$  Hz, 3H);  $^{13}\text{C NMR}$  (100 MHz,  $\text{CDCl}_3$ )  $\delta$  166.5, 161.2, 156.3, 149.2, 136.0, 131.4, 130.1, 129.8, 128.9, 127.3, 125.4, 123.7, 119.8, 114.3, 61.9, 55.4, 14.4.

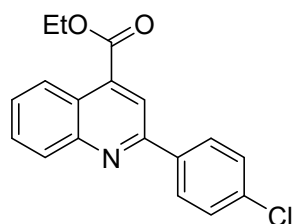

**Ethyl 2-(4-chlorophenyl)quinoline-4-carboxylate (4p).** Eluent:  $V_{PE}/V_{EA} = 100:1$ ; Yield: 26mg (42 %); Yellow liquid;  $^1\text{H NMR}$  (400 MHz,  $\text{CDCl}_3$ )  $\delta$  8.72 (d,  $J = 8.4$  Hz, 1H), 8.32 (s, 1H), 8.20 (d,  $J = 8.4$  Hz, 1H), 8.14 (d,  $J = 8.4$  Hz, 2H), 7.76 (d,  $J = 7.6$  Hz, 1H), 7.62 (d,  $J = 7.6$  Hz, 1H), 7.49 (d,  $J = 8.4$  Hz, 2H), 4.54 (d,  $J = 7.2$  Hz, 2H), 1.50 (d,  $J = 7.2$  Hz, 3H);  $^{13}\text{C NMR}$  (100 MHz,  $\text{CDCl}_3$ )  $\delta$  166.3, 155.3, 149.1, 137.1, 136.3, 136.0, 130.2, 130.1, 129.1, 128.7, 127.9, 125.5, 124.1, 119.7, 62.1, 14.4;

HRMS (ESI-TOF)  $m/z$ :  $[M + H]^+$  Calcd for  $C_{18}H_{15}ClNO_2^+$  312.0786; Found 312.0789.

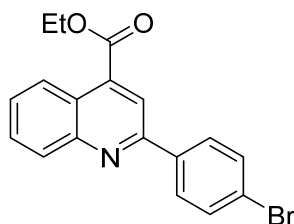

**Ethyl 2-(4-bromophenyl)quinoline-4-carboxylate (4q).**<sup>5</sup> Eluent:  $V_{PE}/V_{EA} = 100:1$ ; Yield: 26 mg (36 %); White solid; m.p. 90-92 °C;  $^1H$  NMR (400 MHz,  $CDCl_3$ )  $\delta$  8.73 (d,  $J = 8.4$  Hz, 1H), 8.34 (s, 1H), 8.22 (d,  $J = 8.4$  Hz, 1H), 8.09 (d,  $J = 8.4$  Hz, 2H), 7.77 (t,  $J = 7.0$  Hz, 1H), 7.67 (d,  $J = 8.6$  Hz, 2H), 7.63 (d,  $J = 7.2$  Hz, 1H), 4.55 (q,  $J = 7.2$  Hz, 2H), 1.51 (t,  $J = 7.2$  Hz, 3H);  $^{13}C$  NMR (100 MHz,  $CDCl_3$ )  $\delta$  166.3, 155.4, 149.1, 137.6, 136.4, 132.1, 130.2, 130.1, 129.0, 128.0, 125.5, 124.4, 124.1, 119.7, 62.0, 14.4.

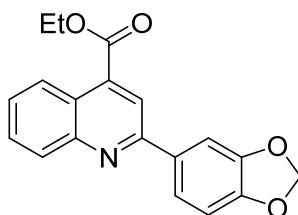

**Ethyl 2-(benzo[d][1,3]dioxol-5-yl)quinoline-4-carboxylate (4r).** Eluent:  $V_{PE}/V_{EA} = 70:1$ ; Yield: 21 mg (33 %); Yellow solid, m.p. 103-105 °C;  $^1H$  NMR (400 MHz,  $CDCl_3$ )  $\delta$  8.70 (d,  $J = 8.4$  Hz, 1H), 8.30 (s, 1H), 8.18 (d,  $J = 8.4$  Hz, 1H), 7.79 – 7.68 (m, 3H), 7.59 (t,  $J = 7.8$  Hz, 1H), 6.96 (d,  $J = 8.2$  Hz, 1H), 6.05 (s, 2H), 4.54 (q,  $J = 7.2$  Hz, 2H), 1.50 (t,  $J = 7.2$  Hz, 3H);  $^{13}C$  NMR (100 MHz,  $CDCl_3$ )  $\delta$  166.4, 156.0, 149.2, 149.1, 148.5, 136.1, 133.3, 130.1, 129.9, 127.5, 125.4, 123.8, 121.8, 119.8, 108.5, 107.8, 101.5, 61.9, 14.3; HRMS (ESI-TOF)  $m/z$ :  $[M + H]^+$  Calcd for  $C_{19}H_{16}NO_4^+$  322.1074; Found 322.1085.

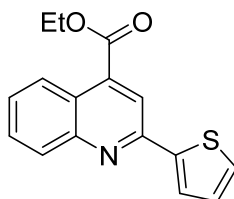



**Ethyl 2-(thiophen-2-yl)quinoline-4-carboxylate (4s).** Eluent:  $V_{PE}/V_{EA} = 70:1$ ; Yield: 22mg (40 %); Yellow liquid;  $^1\text{H NMR}$  (400 MHz,  $\text{CDCl}_3$ )  $\delta$  8.67 (d,  $J = 8.4$  Hz, 1H), 8.27 (s, 1H), 8.14 (d,  $J = 8.4$  Hz, 1H), 7.79 (d,  $J = 3.4$  Hz, 1H), 7.72 (t,  $J = 7.6$  Hz, 1H), 7.57 (t,  $J = 7.6$  Hz, 1H), 7.49 (d,  $J = 5.0$  Hz, 1H), 7.19 – 7.13 (m, 1H), 4.54 (q,  $J = 7.2$  Hz, 2H), 1.50 (t,  $J = 7.2$  Hz, 3H);  $^{13}\text{C NMR}$  (100 MHz,  $\text{CDCl}_3$ )  $\delta$  166.2, 151.8, 149.0, 144.6, 136.1, 130.0, 129.8, 129.1, 128.2, 127.5, 126.4, 125.5, 124.0, 119.0, 62.0, 14.3; HRMS (ESI-TOF)  $m/z$ :  $[\text{M} + \text{H}]^+$  Calcd for  $\text{C}_{16}\text{H}_{14}\text{NO}_2\text{S}^+$  284.0740; Found 284.0749.

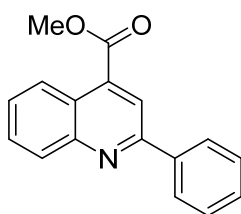

**Methyl 2-phenylquinoline-4-carboxylate (4t).**<sup>6</sup> Eluent:  $V_{PE}/V_{EA} = 80:1$ ; Yield: 24 mg (46 %); Yellow solid, m.p. 56-58 °C;  $^1\text{H NMR}$  (400 MHz,  $\text{CDCl}_3$ )  $\delta$  8.73 (d,  $J = 8.8$  Hz, 1H), 8.38 (s, 1H), 8.24 – 8.17 (m, 3H), 7.75 (d,  $J = 7.6$  Hz, 1H), 7.60 (d,  $J = 7.8$  Hz, 1H), 7.53 (d,  $J = 7.2$  Hz, 2H), 7.48 (d,  $J = 7.2$  Hz, 1H), 4.04 (s, 3H);  $^{13}\text{C NMR}$  (100 MHz,  $\text{CDCl}_3$ )  $\delta$  166.8, 156.7, 149.2, 138.7, 135.6, 130.3, 129.9, 129.8, 128.9, 127.8, 127.5, 125.4, 124.0, 120.3, 52.7.

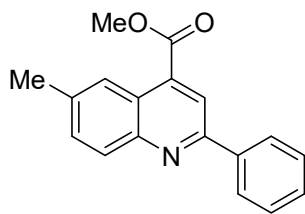

**Methyl 6-methyl-2-phenylquinoline-4-carboxylate (4u).**<sup>3</sup> Eluent:  $V_{PE}/V_{EA} = 80:1$ ; Yield: 16 mg (29 %); Yellow solid, m.p. 92-94 °C;  $^1\text{H NMR}$  (400 MHz,  $\text{CDCl}_3$ )  $\delta$  8.49 (s, 1H), 8.33 (s, 1H), 8.17 (d,  $J = 7.2$  Hz, 2H), 8.10 (d,  $J = 8.4$  Hz, 1H), 7.57 (dd,  $J = 8.8, 1.6$  Hz, 1H), 7.52 (d,  $J = 7.2$  Hz, 2H), 7.45 (d,  $J = 7.2$  Hz, 1H), 4.04 (s, 3H), 2.56 (s, 3H);  $^{13}\text{C NMR}$  (100 MHz,  $\text{CDCl}_3$ )  $\delta$  166.9, 155.7, 147.9, 138.8, 138.0, 134.8, 132.2, 129.9, 129.5, 128.9, 127.4, 124.2, 124.0, 120.2, 52.7, 22.1.

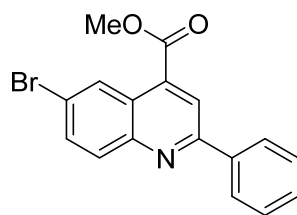

**Methyl 6-bromo-2-phenylquinoline-4-carboxylate (4v).** Eluent:  $V_{PE}/V_{EA} = 80:1$ ; Yield: 15 mg (22 %); Yellow solid, m.p. 102-104 °C;  $^1H$  NMR (400 MHz,  $CDCl_3$ )  $\delta$  8.99 (s, 1H), 8.43 (s, 1H), 8.19 (d,  $J = 8.0$  Hz, 2H), 8.07 (d,  $J = 9.2$  Hz, 1H), 7.83 (d,  $J = 9.2$  Hz, 1H), 7.58 – 7.47 (m, 3H), 4.07 (s, 3H);  $^{13}C$  NMR (100 MHz,  $CDCl_3$ )  $\delta$  166.2, 157.0, 147.8, 138.2, 134.4, 133.5, 131.8, 130.1, 129.0, 127.9, 127.4, 125.0, 122.4, 121.1, 52.9; HRMS (ESI-TOF)  $m/z$ :  $[M + H]^+$  Calcd for  $C_{17}H_{13}BrNO_2^+$  342.0124; Found 342.0136.

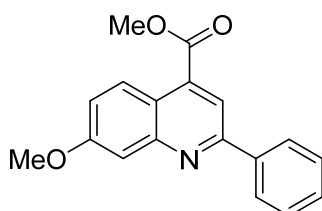

**Methyl 7-methoxy-2-phenylquinoline-4-carboxylate (4w).** Eluent:  $V_{PE}/V_{EA} = 80:1$ ; Yield: 16 mg (27 %); Yellow solid, m.p. 123-126 °C;  $^1H$  NMR (400 MHz,  $CDCl_3$ )  $\delta$  8.65 (d,  $J = 9.6$  Hz, 1H), 8.25 (s, 1H), 8.18 (d,  $J = 7.2$  Hz, 2H), 7.64 – 7.46 (m, 4H), 7.31 – 7.25 (m, 1H), 4.05 (s, 3H), 3.99 (s, 3H);  $^{13}C$  NMR (100 MHz,  $CDCl_3$ )  $\delta$  166.9, 161.0, 157.1, 151.0, 138.7, 135.6, 129.7, 128.9, 127.5, 126.5, 121.1, 119.3, 118.1, 107.9, 55.6, 52.7; HRMS (ESI-TOF)  $m/z$ :  $[M + H]^+$  Calcd for  $C_{18}H_{13}NO_3^+$  294.1125; Found 294.1140.

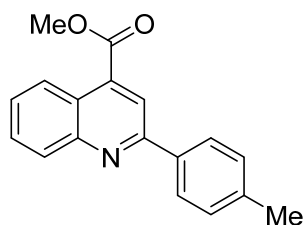

**Methyl 2-(*p*-tolyl)quinoline-4-carboxylate (4x).**<sup>7</sup> Eluent:  $V_{PE}/V_{EA} = 80:1$ ; Yield: 16 mg (29 %); Yellow solid, m.p. 106-108 °C;  $^1H$  NMR (400 MHz,  $CDCl_3$ )  $\delta$  8.65 (d,  $J = 8.4$  Hz, 1H), 8.30 (s, 1H), 8.14 (d,  $J = 8.4$  Hz, 1H), 8.03 (d,  $J = 8.2$  Hz, 2H), 7.68 (t,

$J = 7.0$  Hz, 1H), 7.53 (t,  $J = 8.0$  Hz, 1H), 7.26 (d,  $J = 8.0$  Hz, 2H), 3.99 (s, 3H), 2.36 (s, 3H);  $^{13}\text{C}$  NMR (100 MHz,  $\text{CDCl}_3$ )  $\delta$  165.8, 155.6, 148.2, 138.9, 134.9, 134.6, 129.2, 128.8, 128.6, 126.6, 126.3, 124.4, 122.9, 119.1, 51.6, 20.3.

## References

1. G.-H. Niu, P.-R. Huang and G. J. Chuang, *Asian J. Org. Chem.*, 2016, **5**, 57-61.
2. D. Verbanac, R. Malik, M. Chand, K. Kushwaha, M. Vashist, M. Matijašić, V. Stepanić, M. Perić, H. Čipčić, L. Saso and S. C. Jain, *J. Enzyme Inhib. Med. Chem.*, 2016, **31**, 104-110.
3. L. Yang and J. Wan, *Green Chem.*, 2020, **22**, 3074-3078.
4. A. N. Boa, S. P. Canavan, P. R. Hirst, C. Ramsey, A. M. W. Stead and G. A. McConkey, *Bioorg. Med. Chem.*, 2005, **13**, 1945-1967.
5. D. Duvelleroy, C. Perrio, O. Parisel and M.-C. Lasne, *Org. Biomol. Chem.*, 2005, **3**, 3794-3804.
6. S. DasGupta, P. R. Murumkar, R. Giridhar and M. R. Yadav, *Bioorg. Med. Chem.*, 2009, **17**, 3604-3617.
7. Q. Wang, J. Huang and L. Zhou, *Adv. Synth. Catal.*, 2015, **357**, 2479-2484.

# <sup>1</sup>H and <sup>13</sup>C NMR spectra of all products

hlz-11-1.10.fid

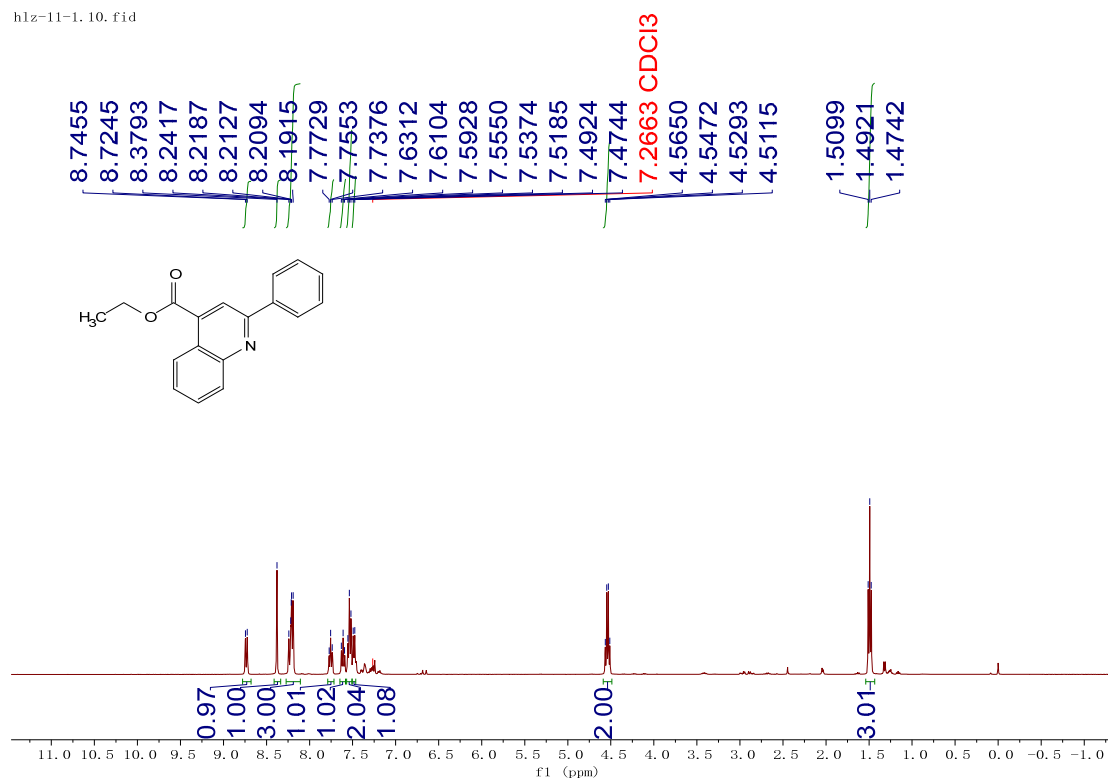

<sup>1</sup>H NMR spectrum of 4a

hlz-12-c.1.fid

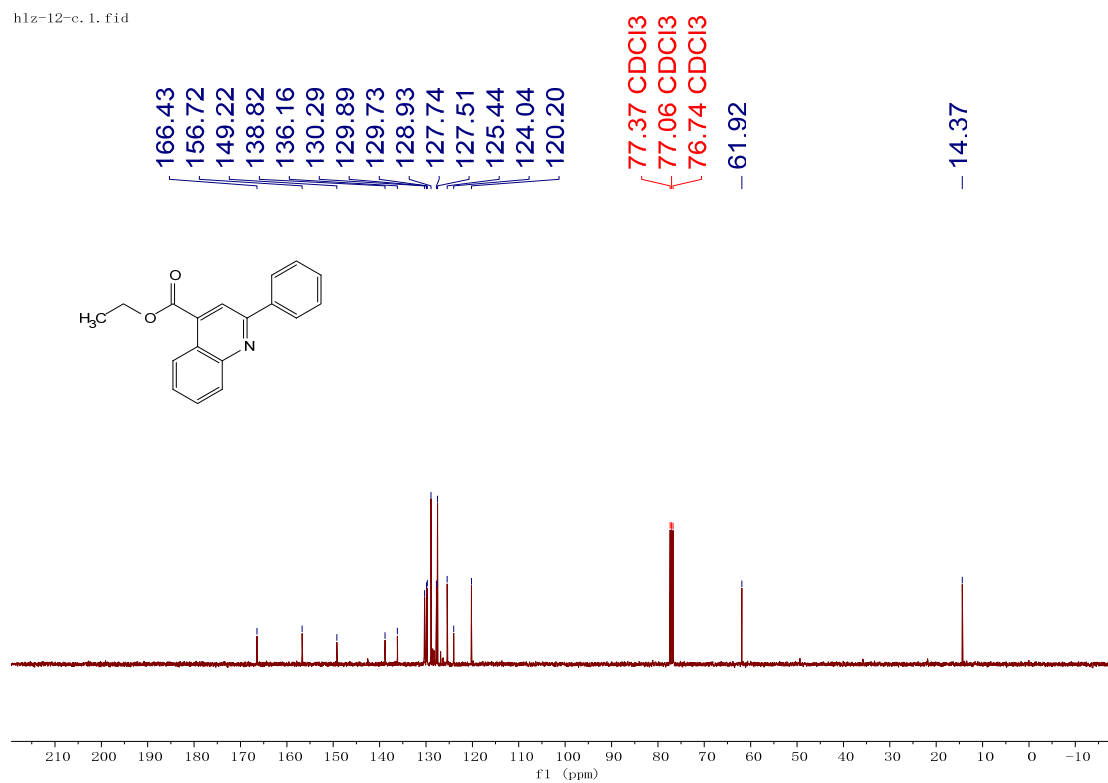

<sup>13</sup>C NMR spectrum of 4a

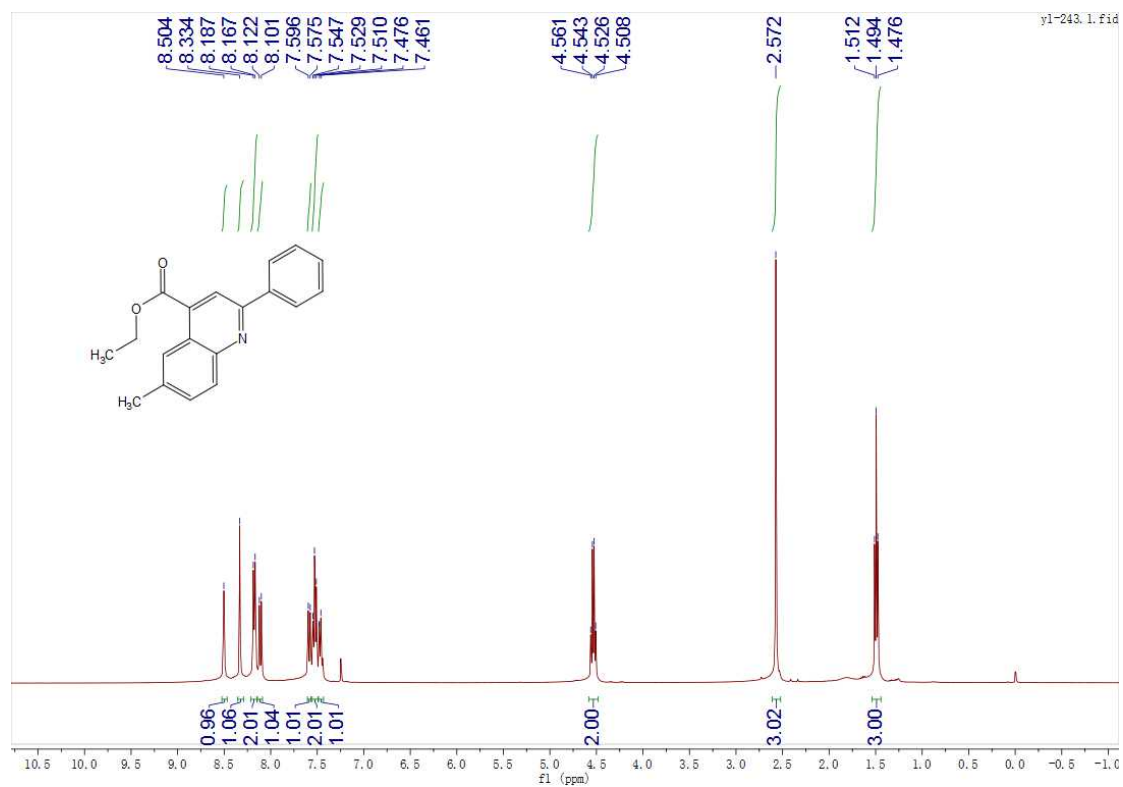

<sup>1</sup>H NMR spectrum of 4b

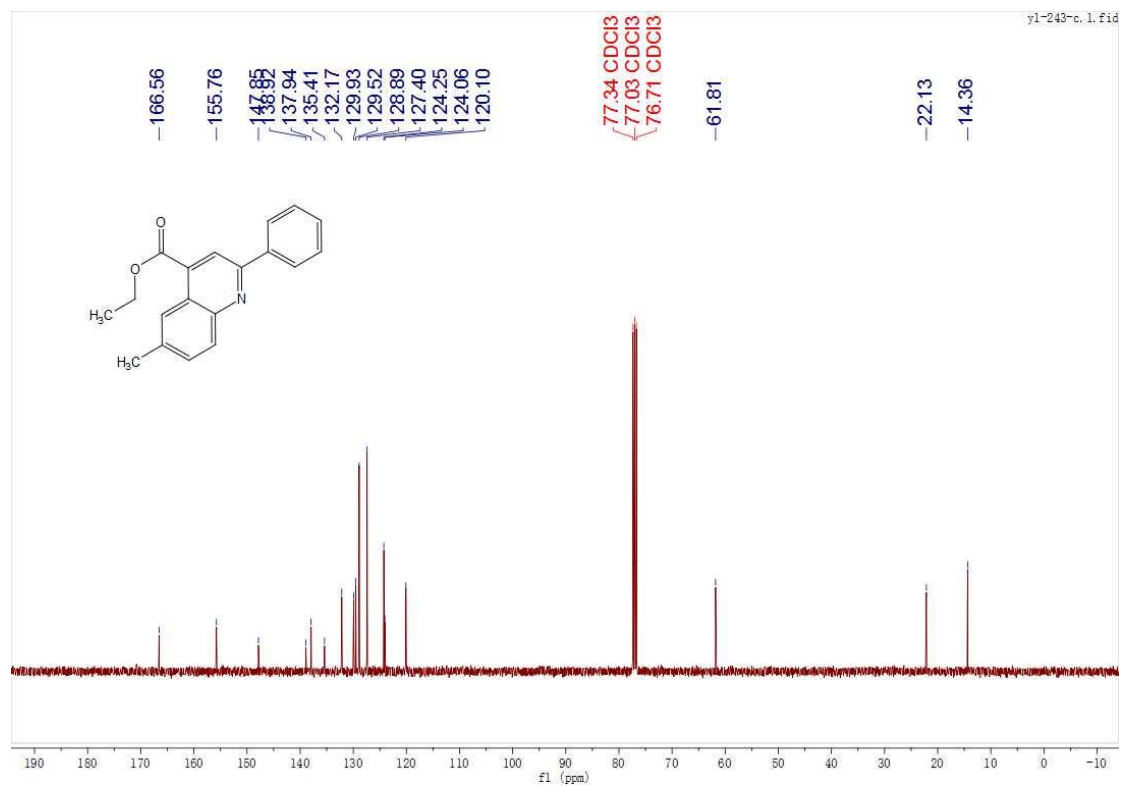

<sup>13</sup>C NMR spectrum of 4b

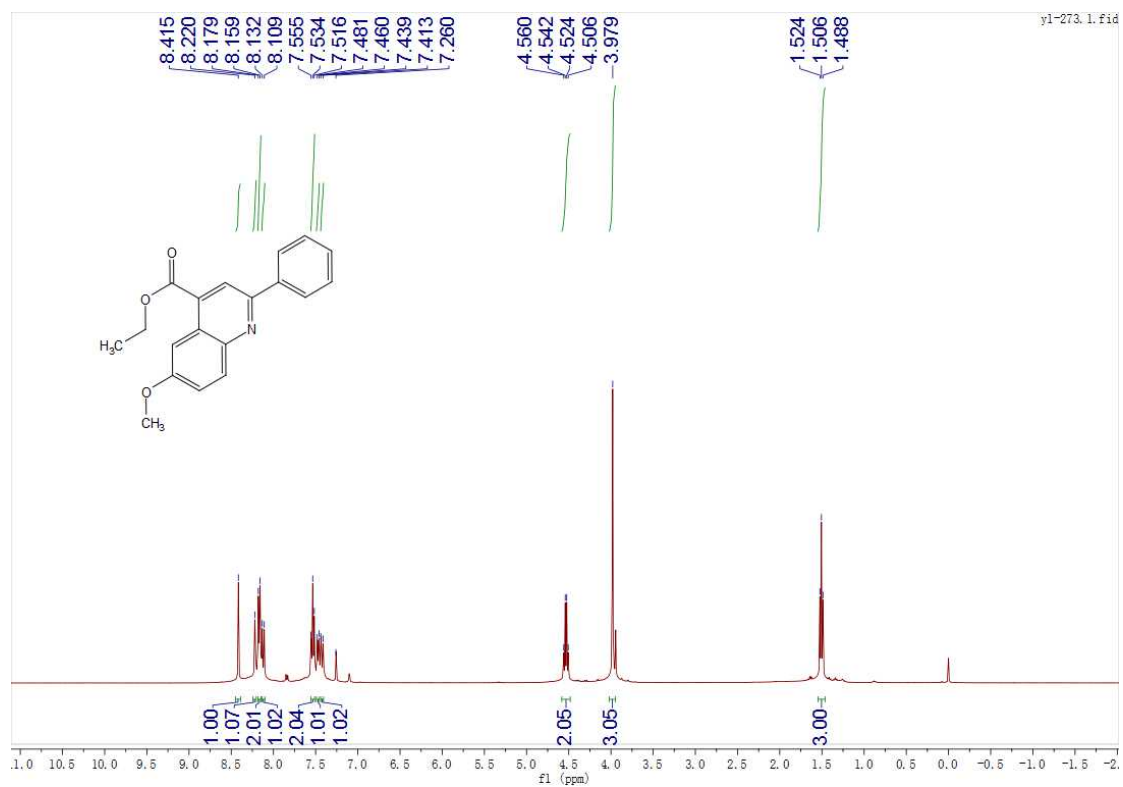

**<sup>1</sup>H NMR spectrum of 4c**

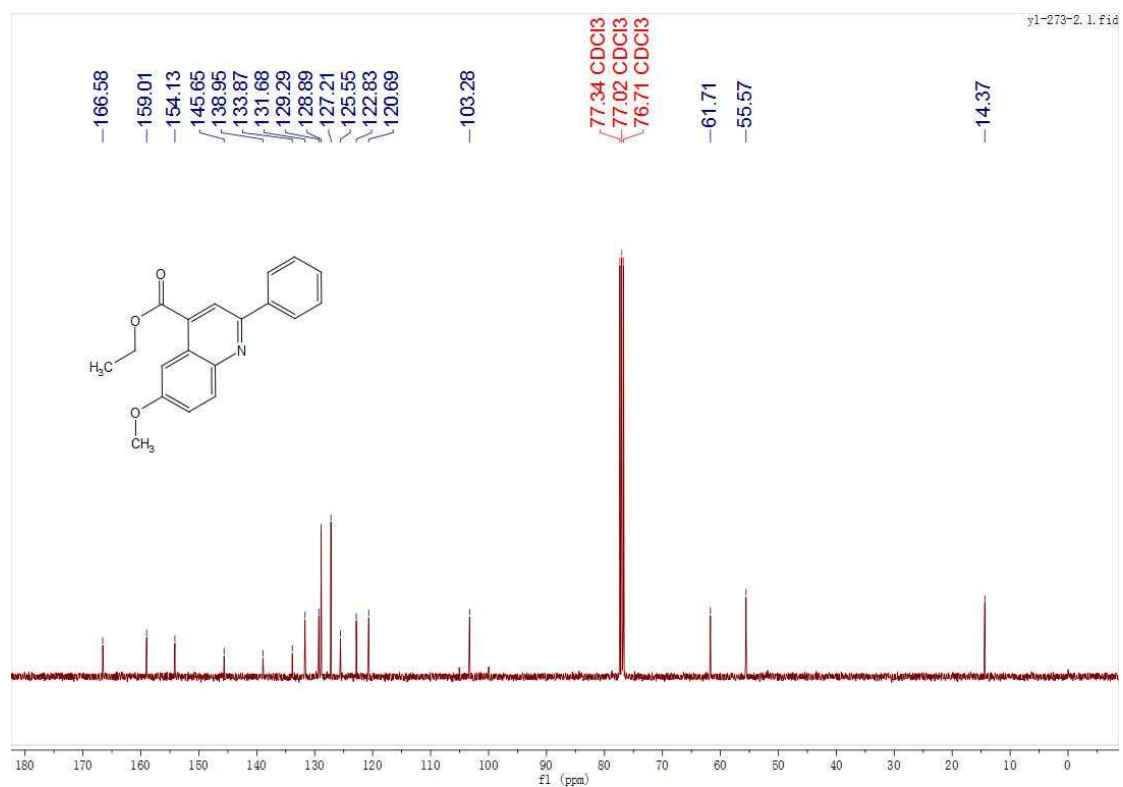

**<sup>13</sup>C NMR spectrum of 4c**

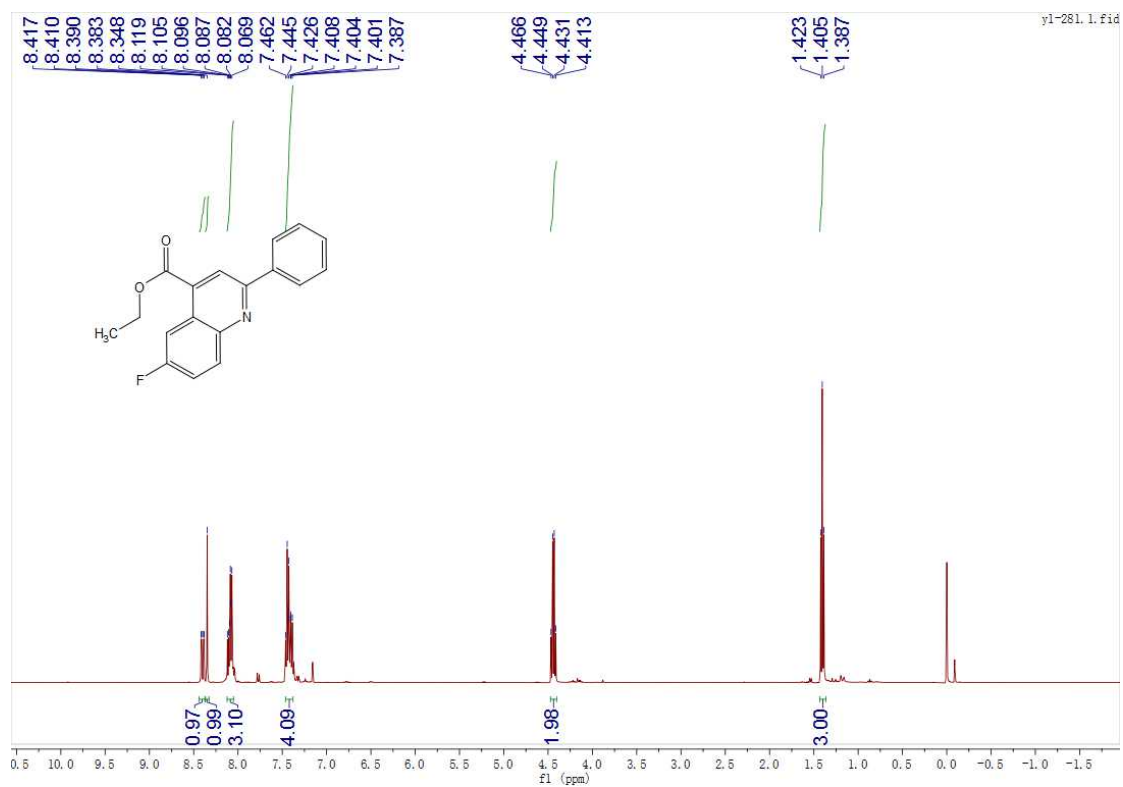

**<sup>1</sup>H NMR spectrum of 4d**

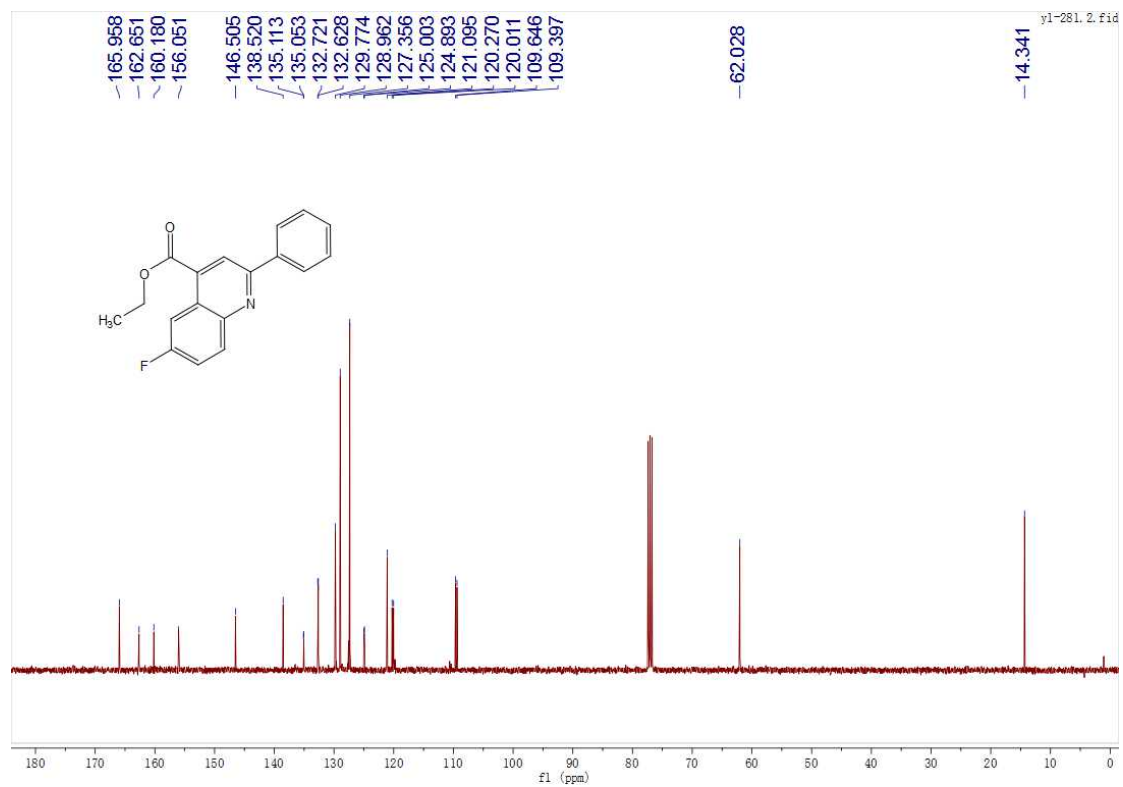

**<sup>13</sup>C NMR spectrum of 4d**

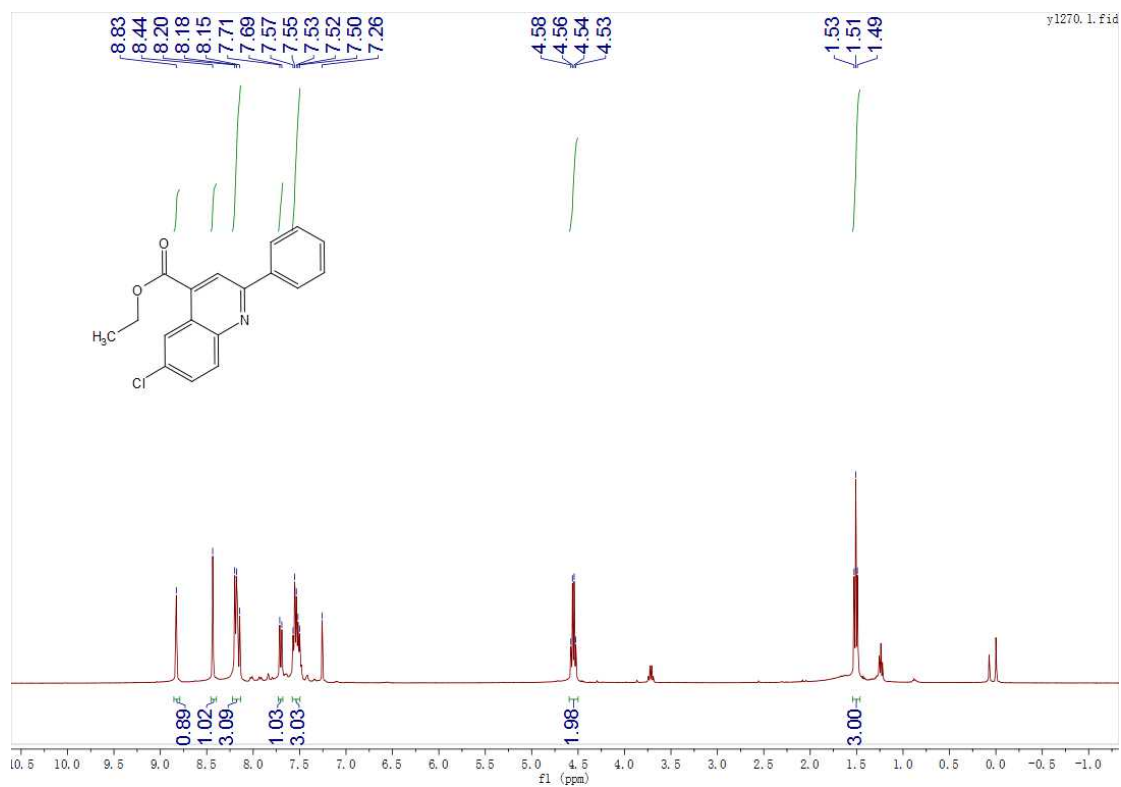

<sup>1</sup>H NMR spectrum of 4e

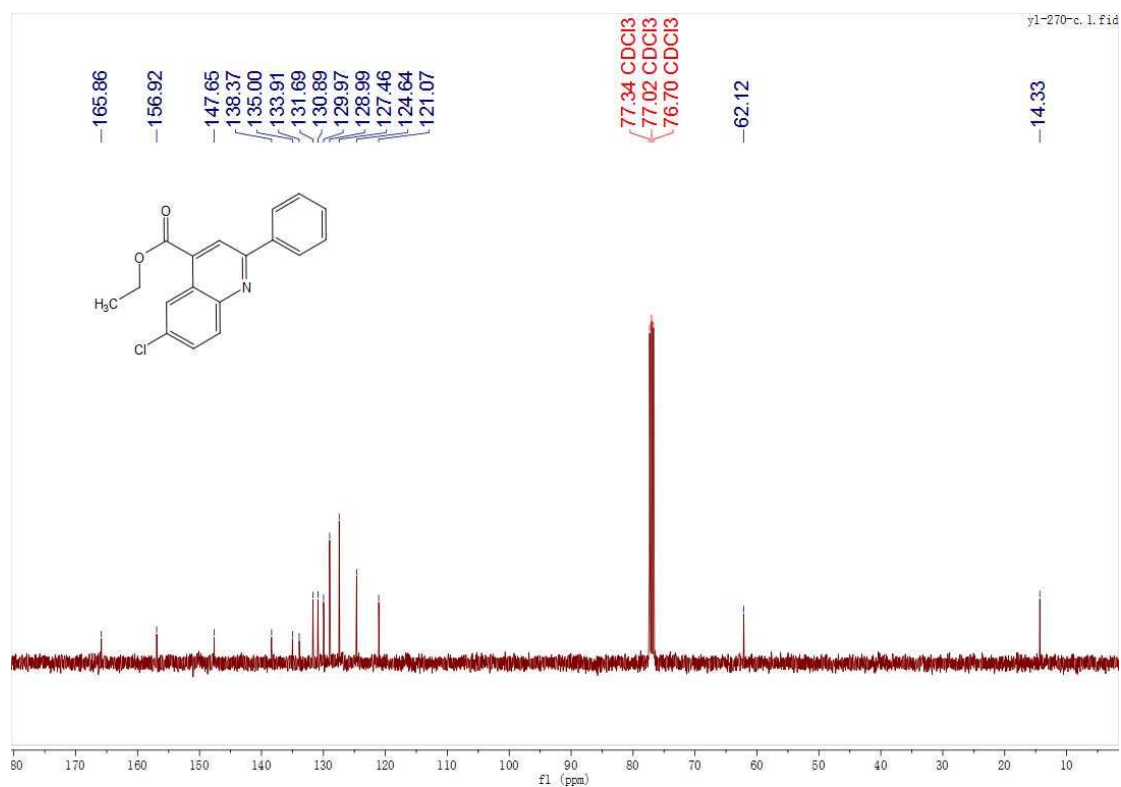

<sup>13</sup>C NMR spectrum of 4e



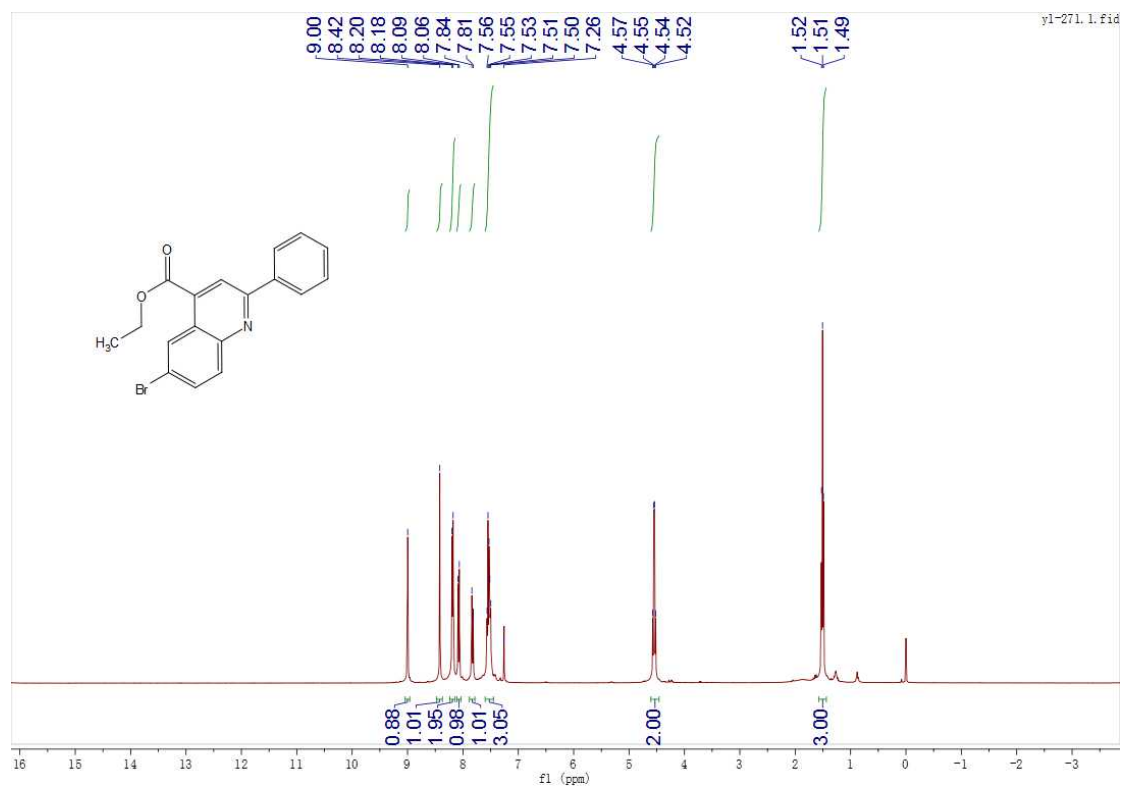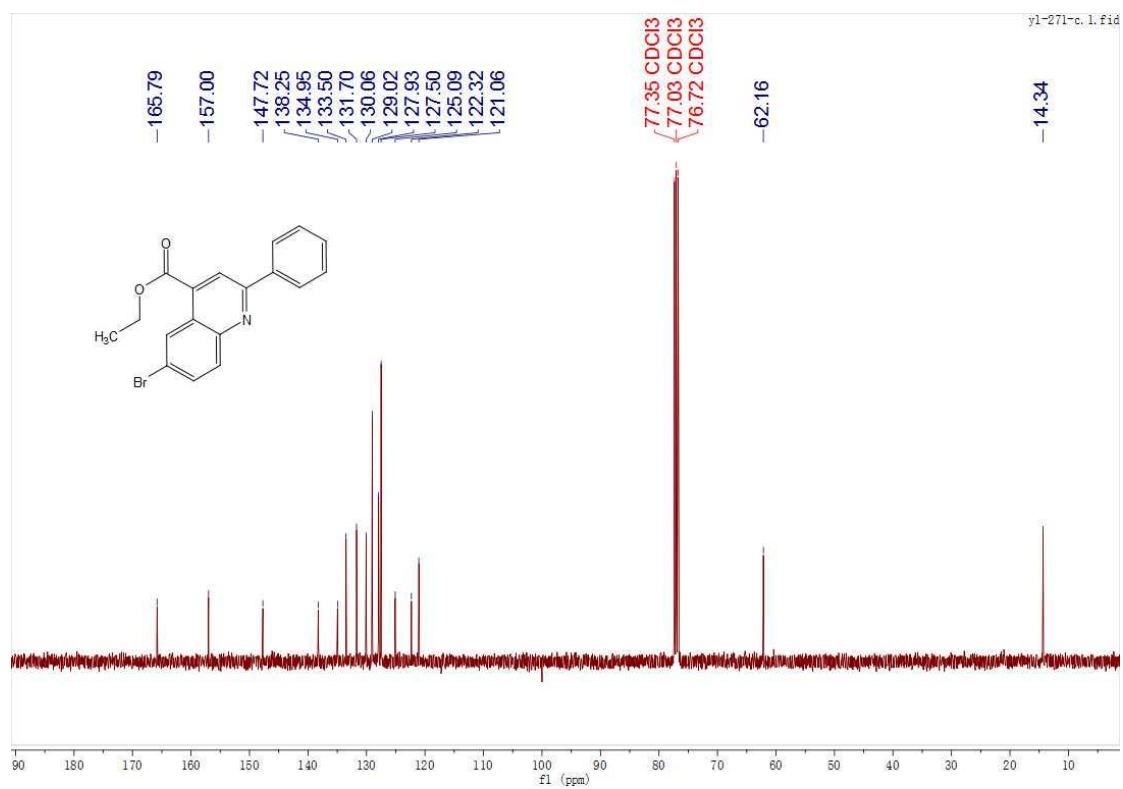

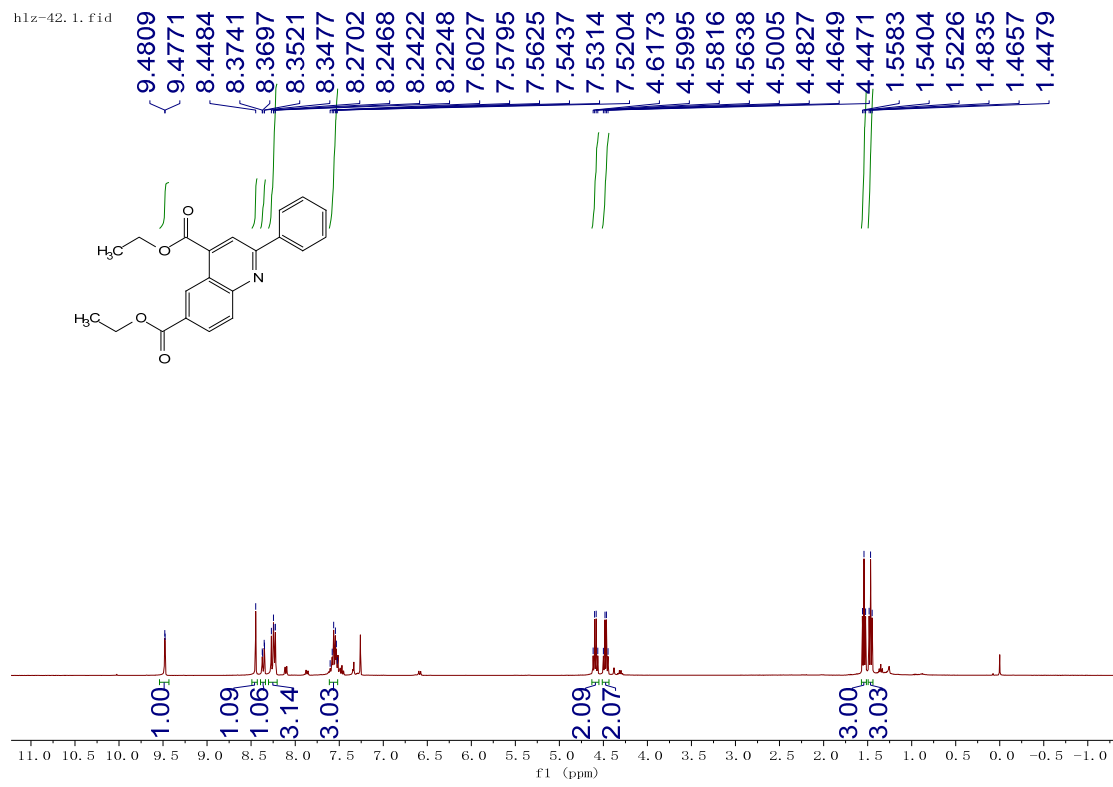

<sup>1</sup>H NMR spectrum of 4g

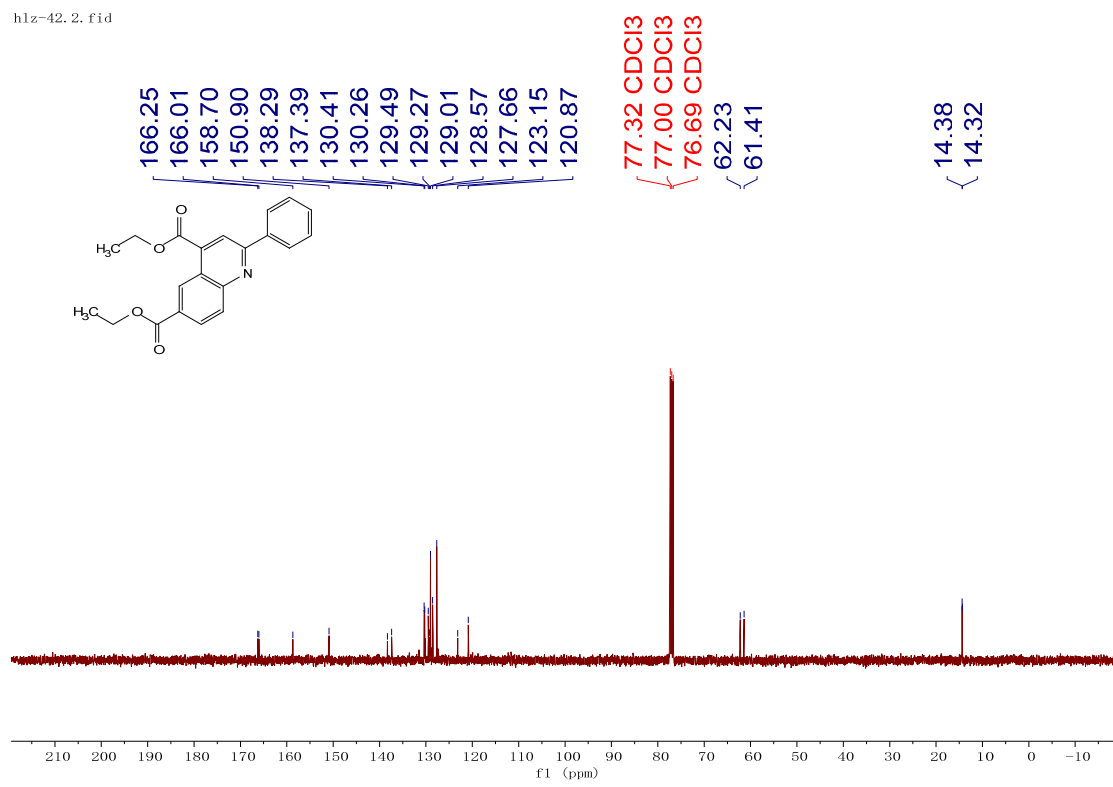

<sup>13</sup>C NMR spectrum of 4g

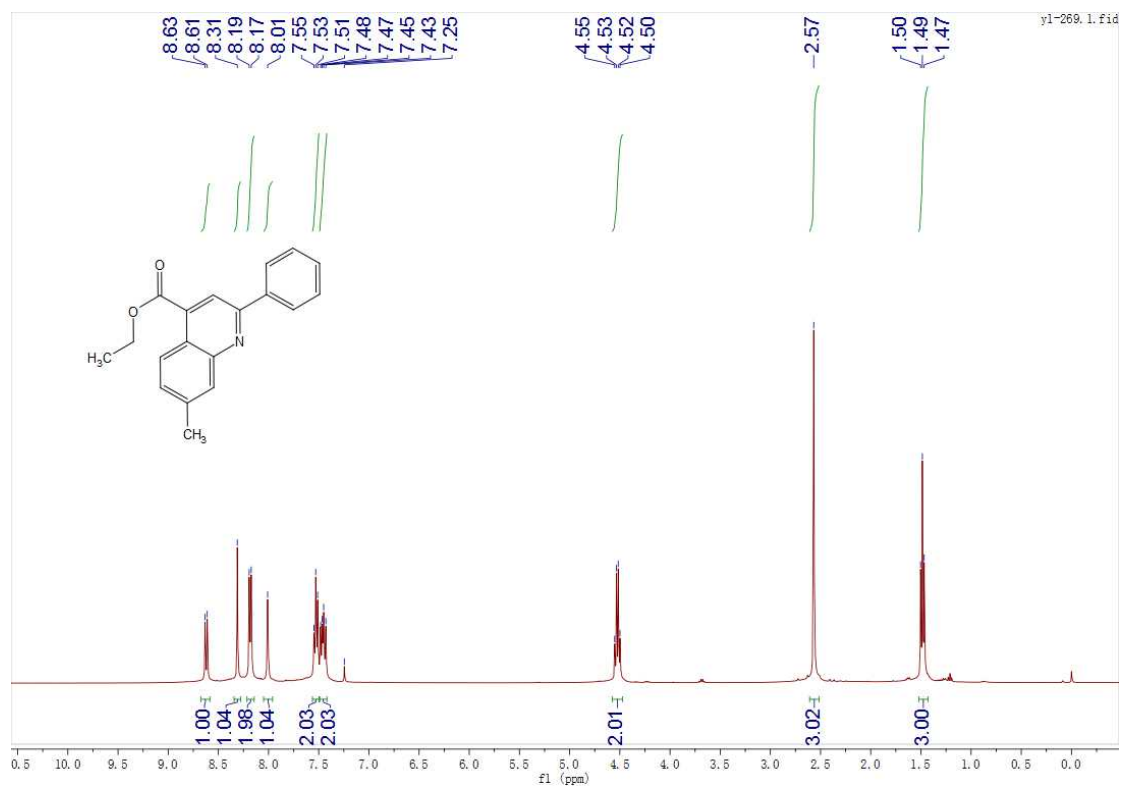

**<sup>1</sup>H NMR spectrum of 4h**

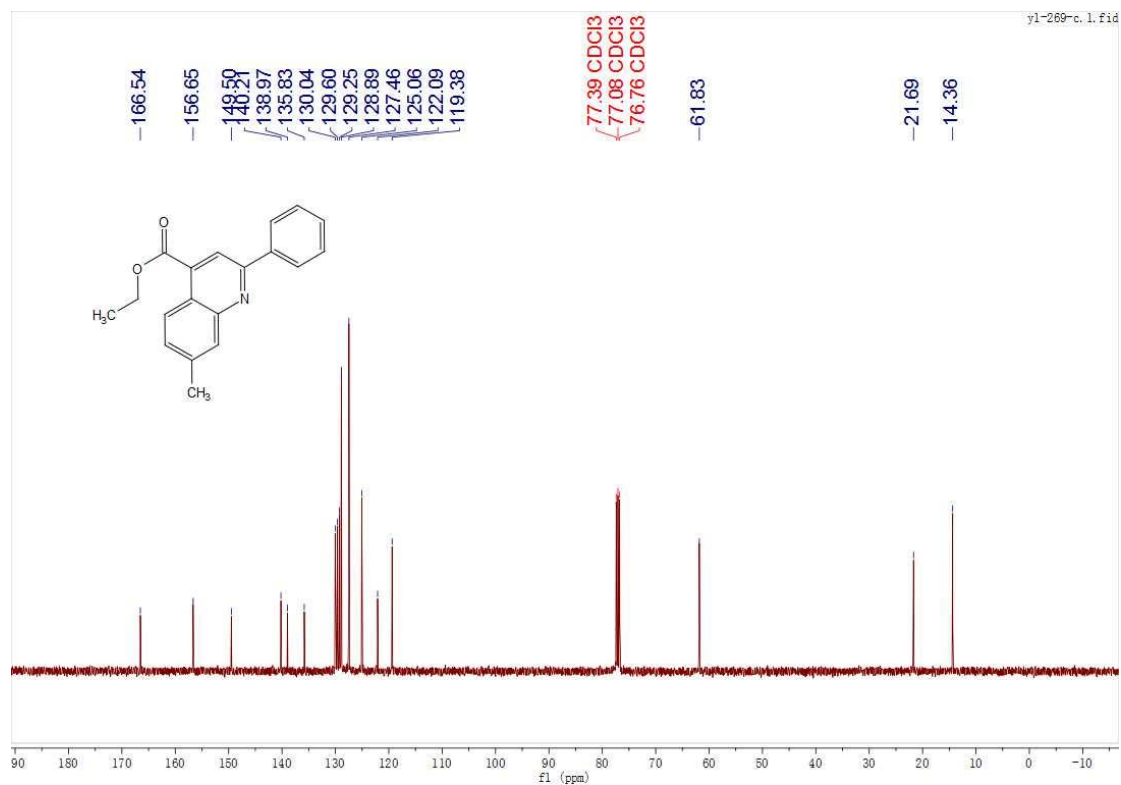

**<sup>13</sup>C NMR spectrum of 4h**

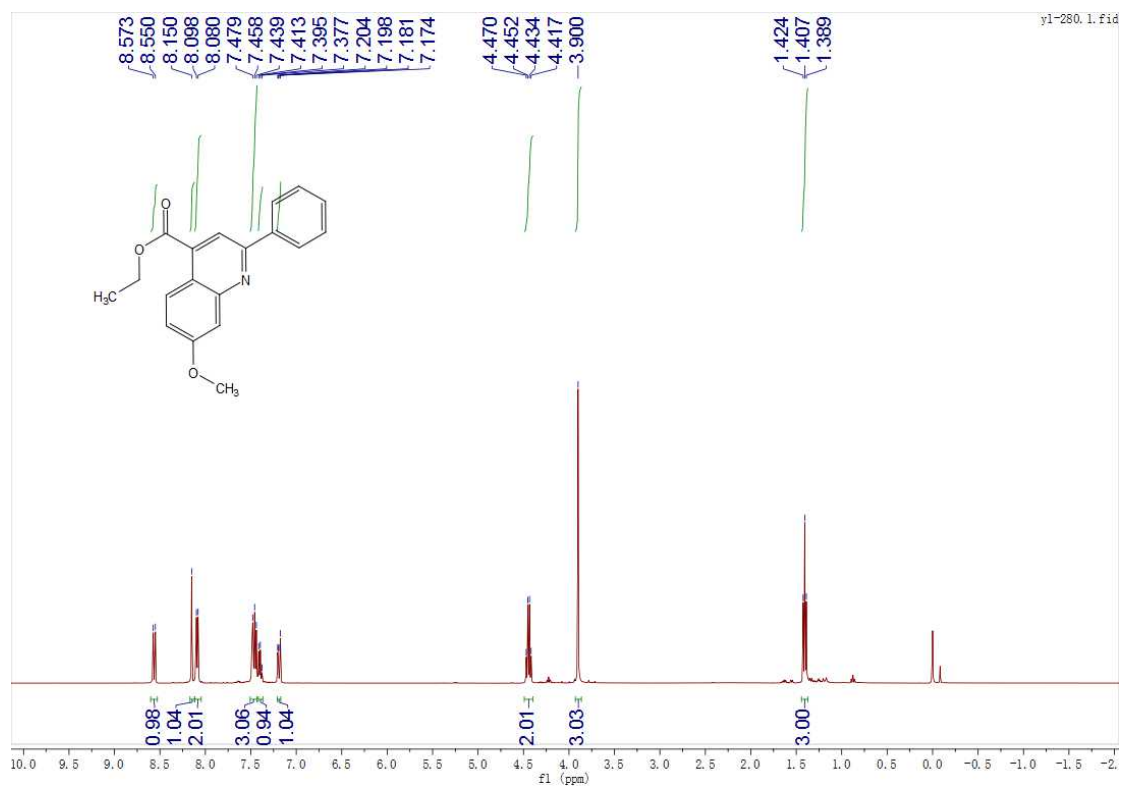

**<sup>1</sup>H NMR spectrum of 4i**

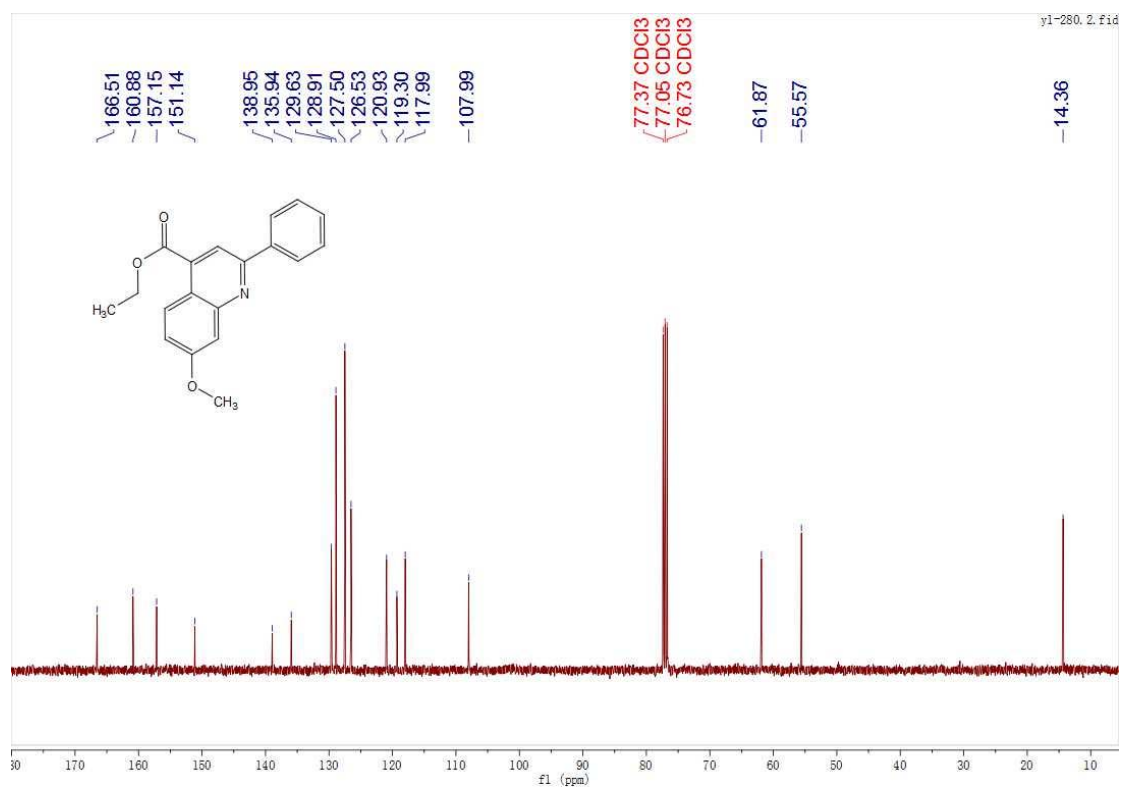

**<sup>13</sup>C NMR spectrum of 4i**

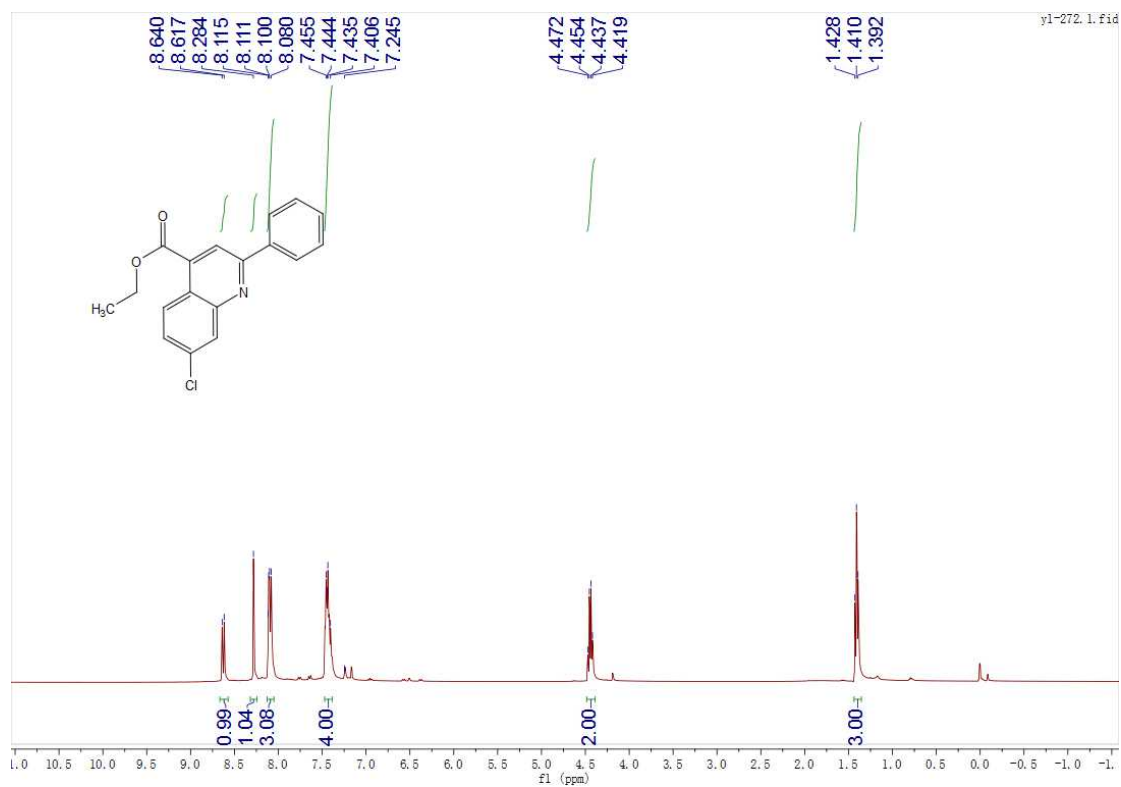

**<sup>1</sup>H NMR spectrum of 4j**

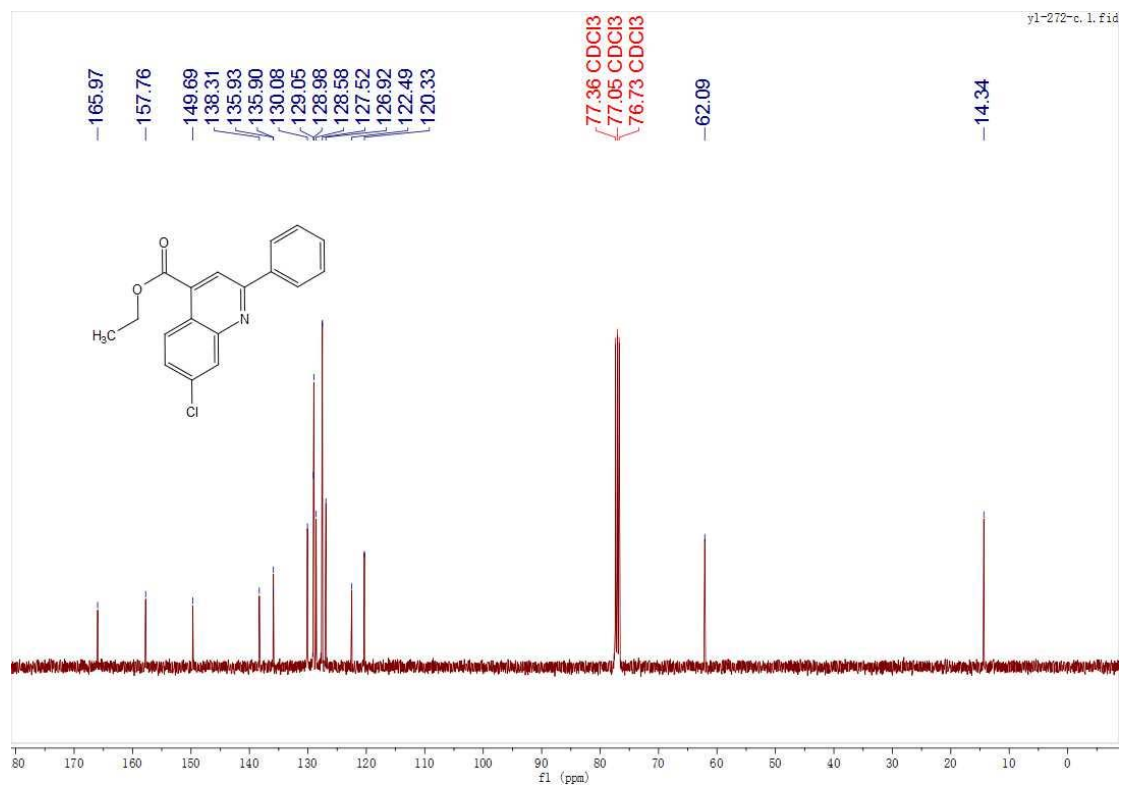

**<sup>13</sup>C NMR spectrum of 4j**

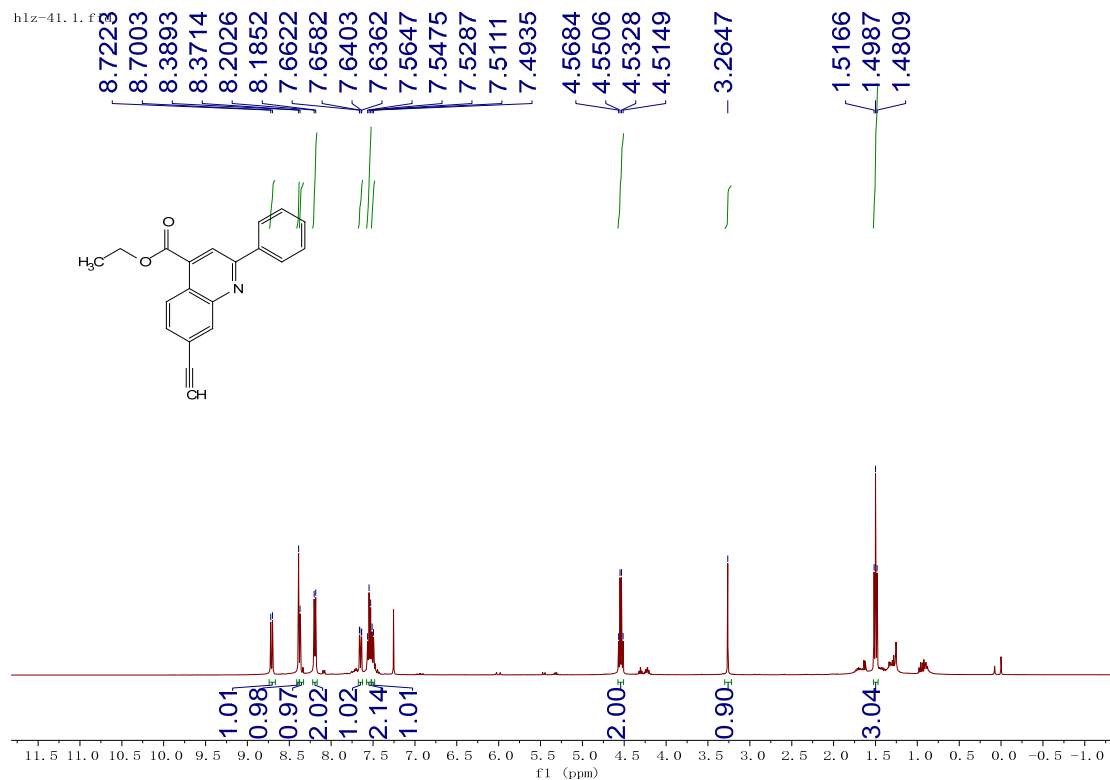

<sup>1</sup>H NMR spectrum of 4k

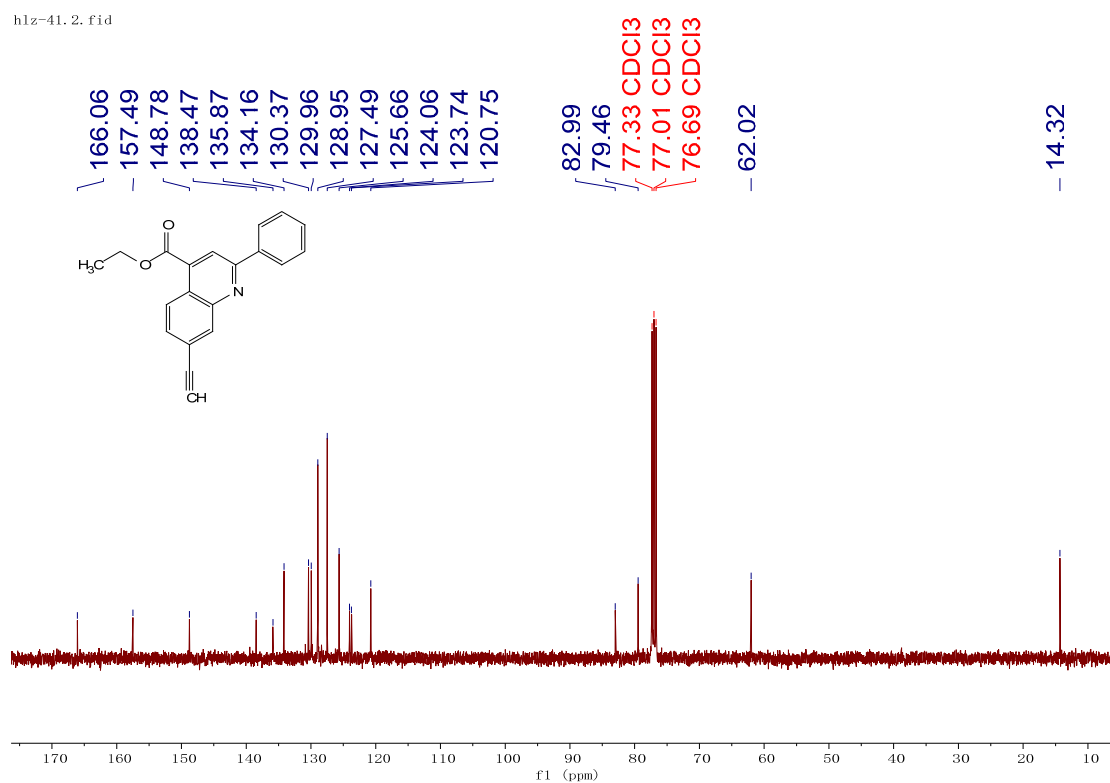

<sup>13</sup>C NMR spectrum of 4k

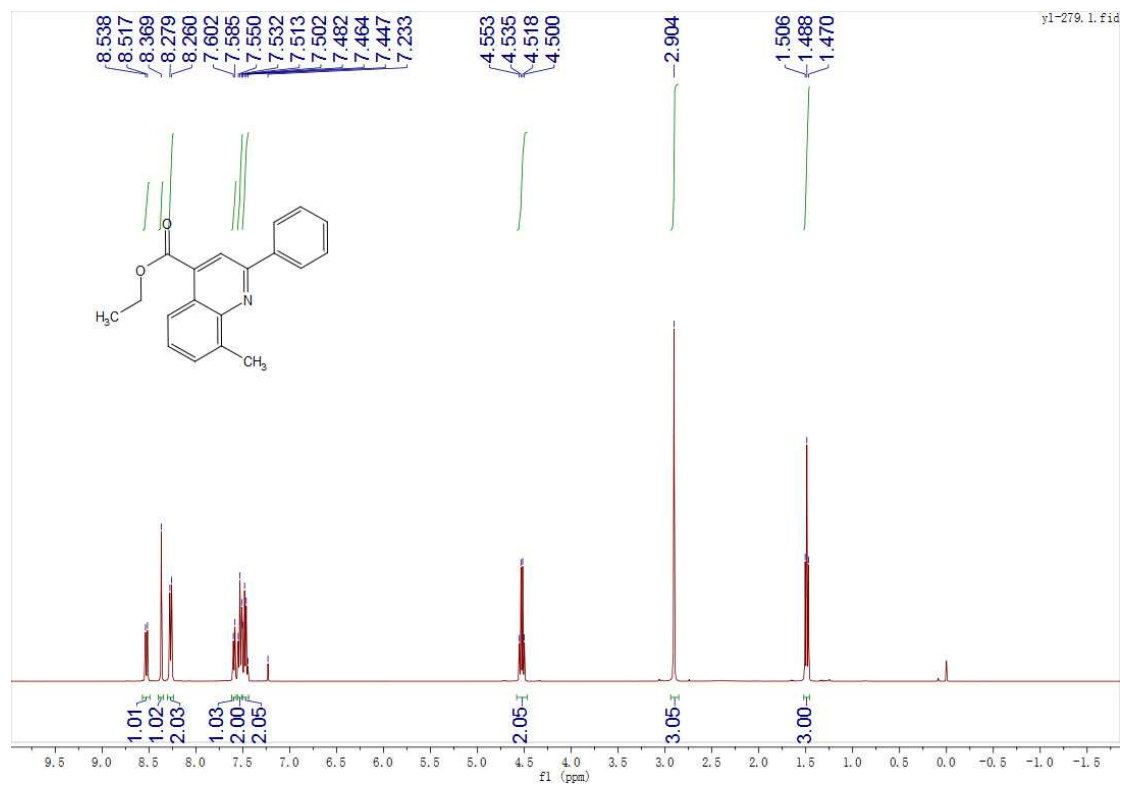

**<sup>1</sup>H NMR spectrum of 4l**

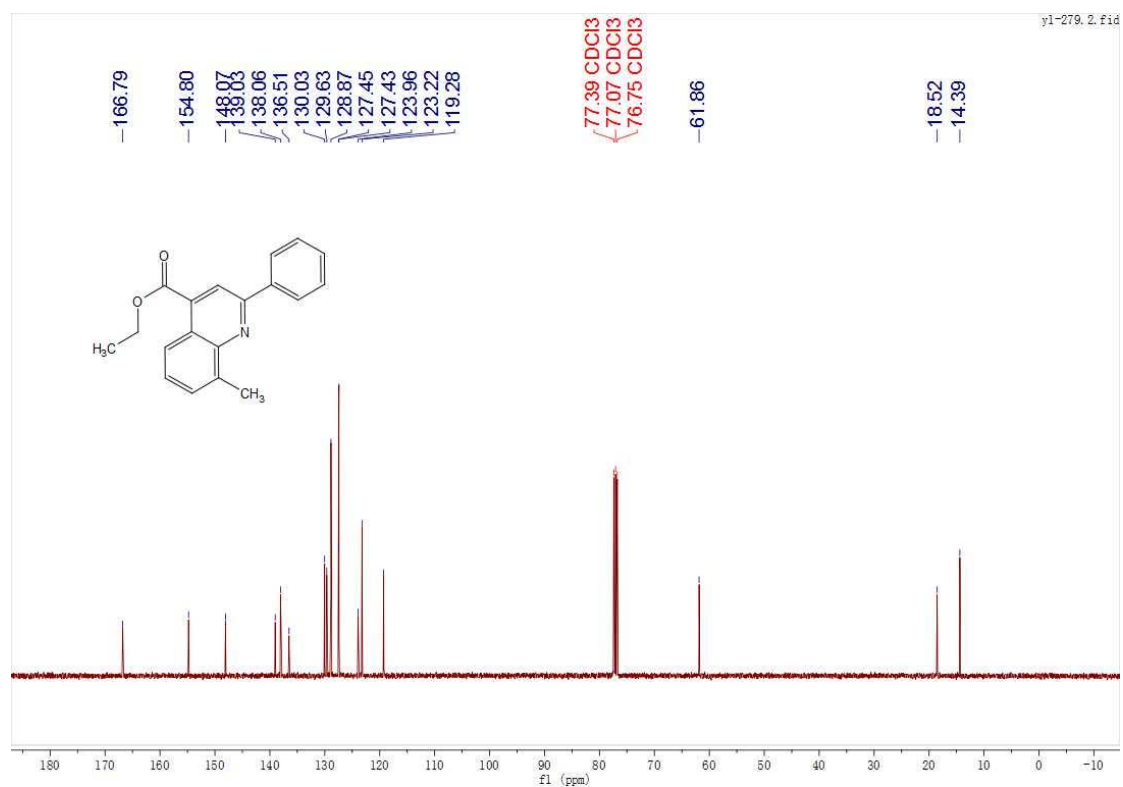

**<sup>13</sup>C NMR spectrum of 4l**

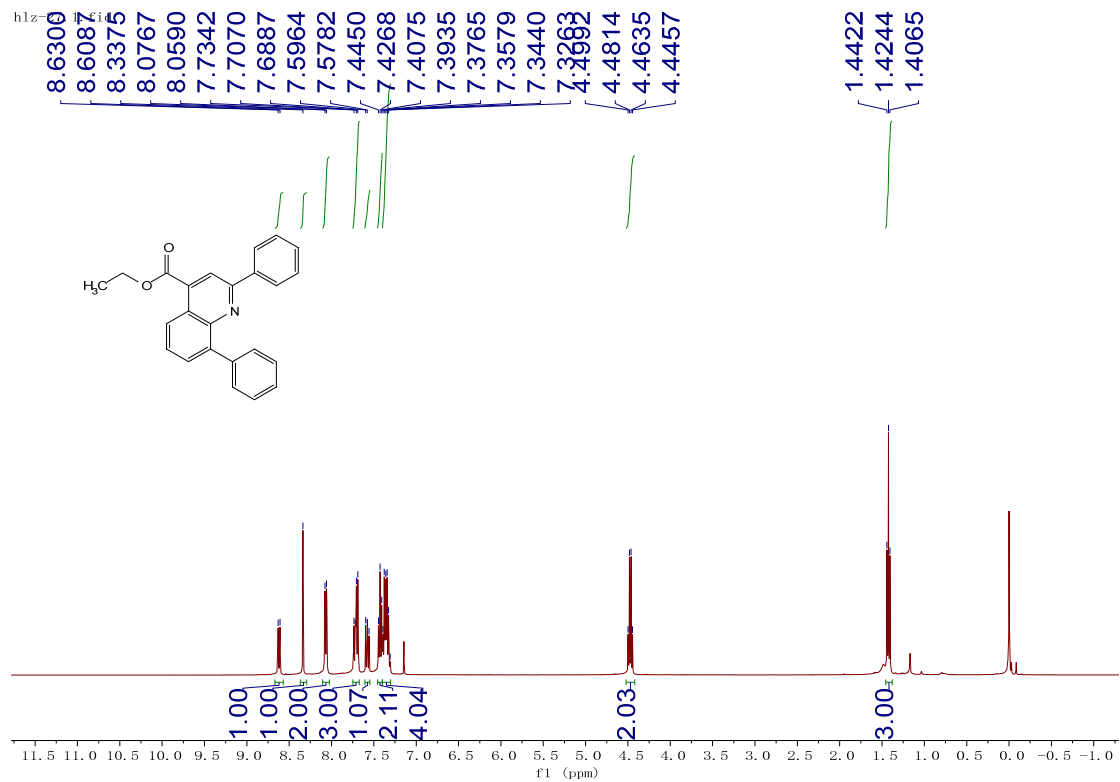

**<sup>1</sup>H NMR spectrum of 4m**

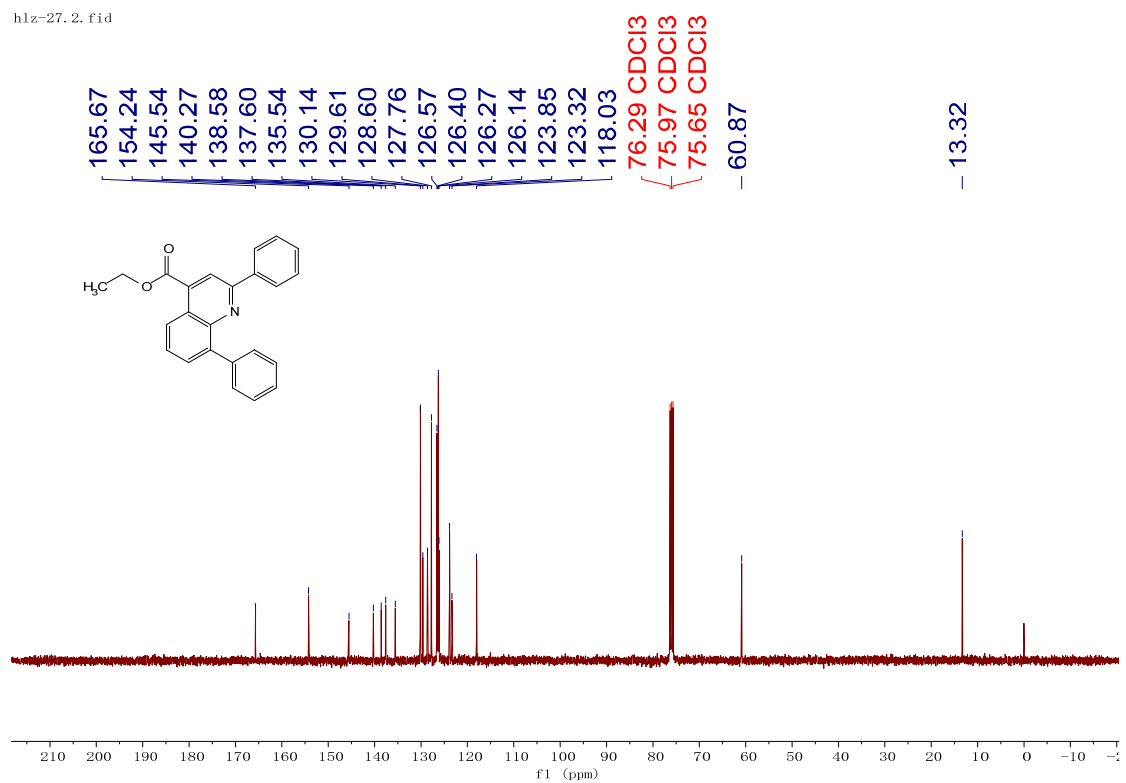

**<sup>13</sup>C NMR spectrum of 4m**



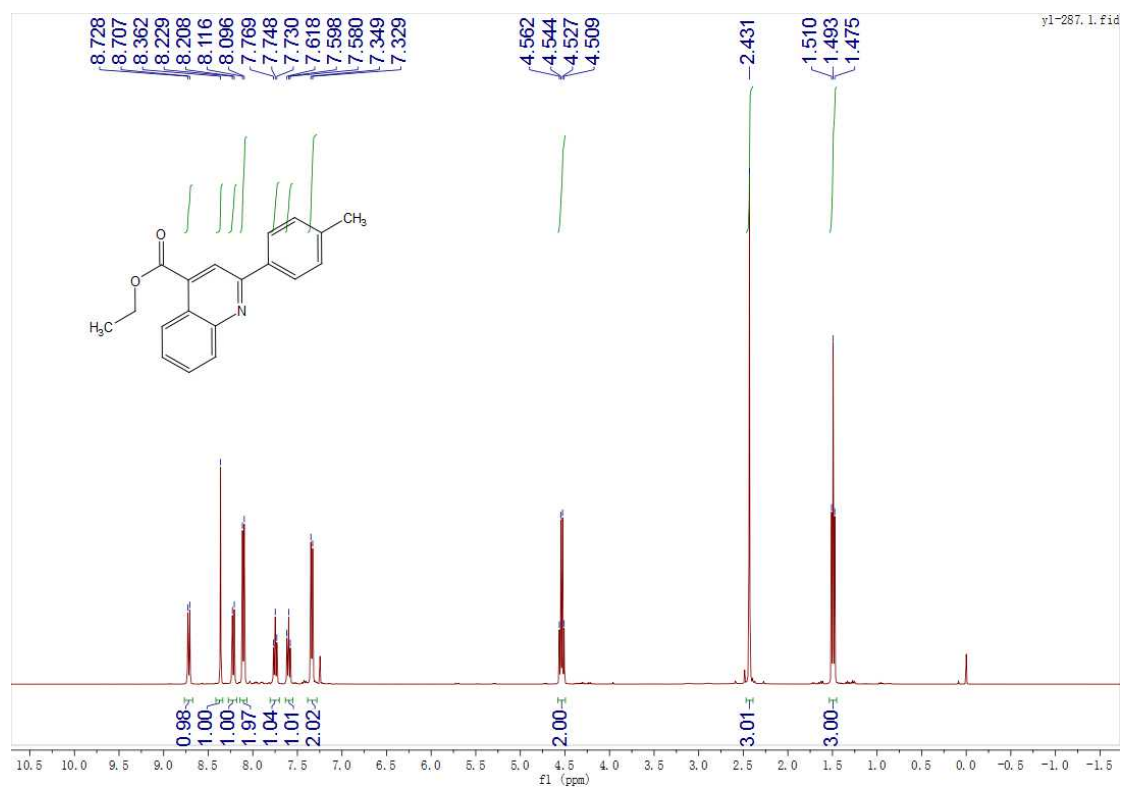

**<sup>1</sup>H NMR spectrum of 4n**

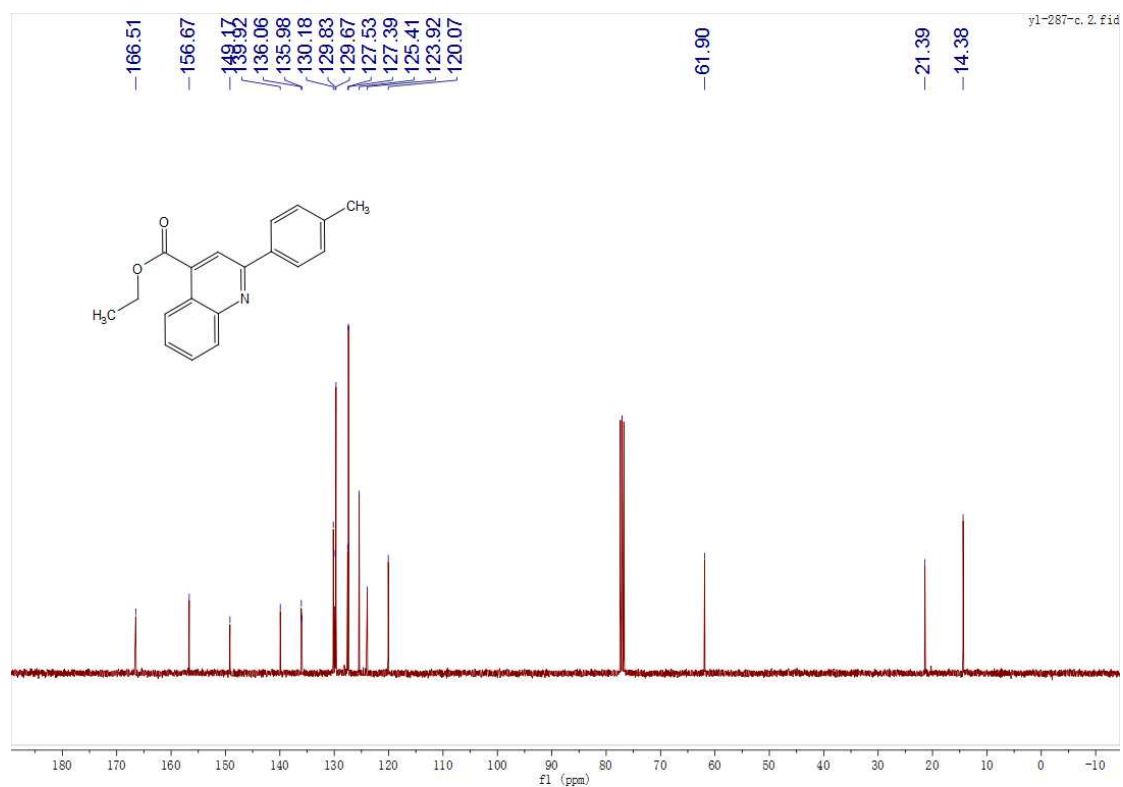

**<sup>13</sup>C NMR spectrum of 4n**

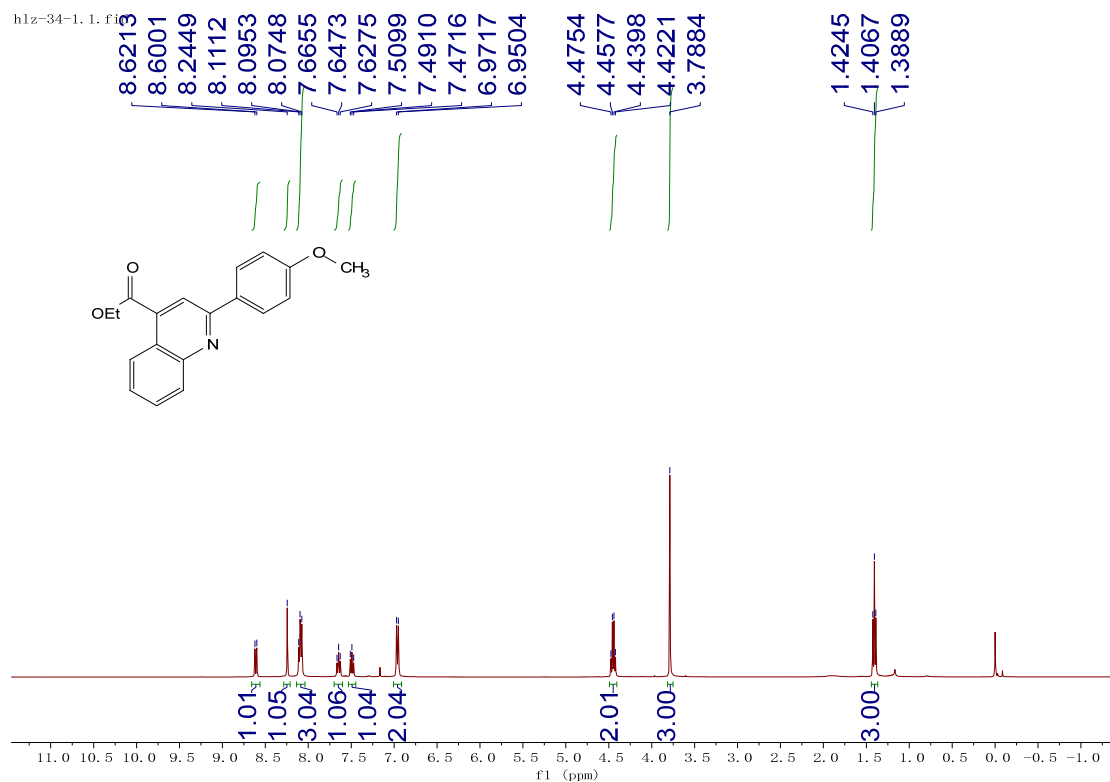

**<sup>1</sup>H NMR spectrum of 40**

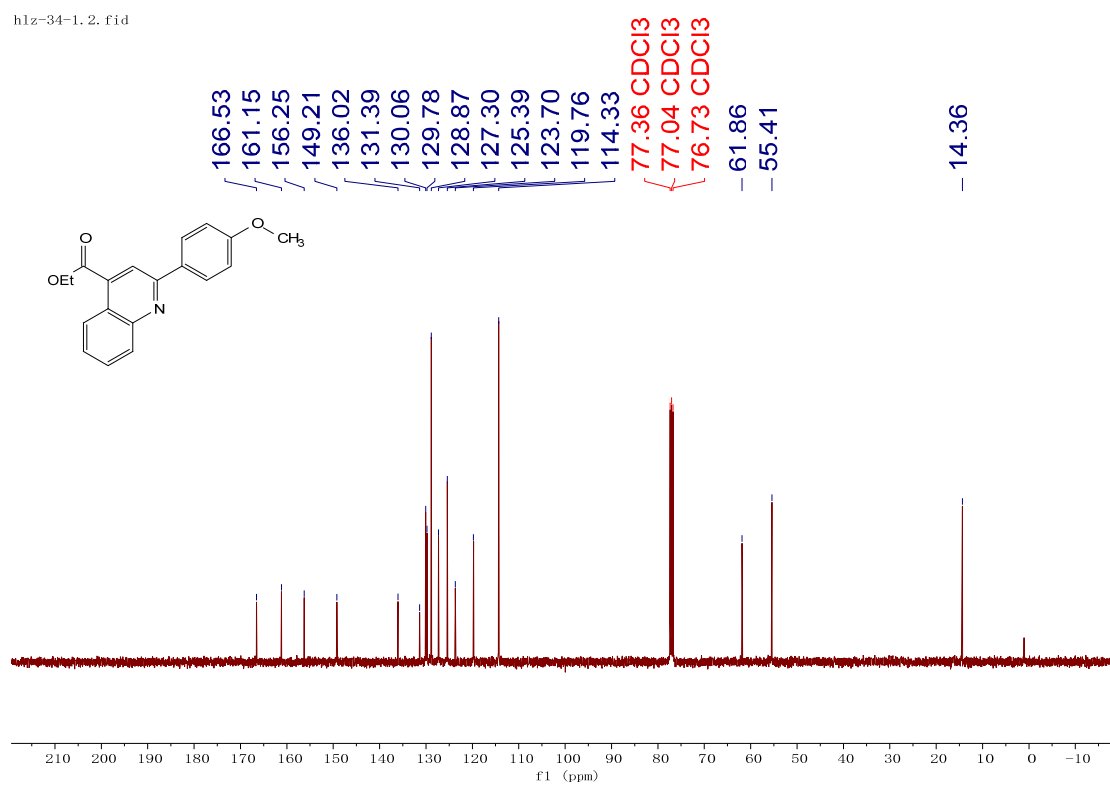

**<sup>13</sup>C NMR spectrum of 40**

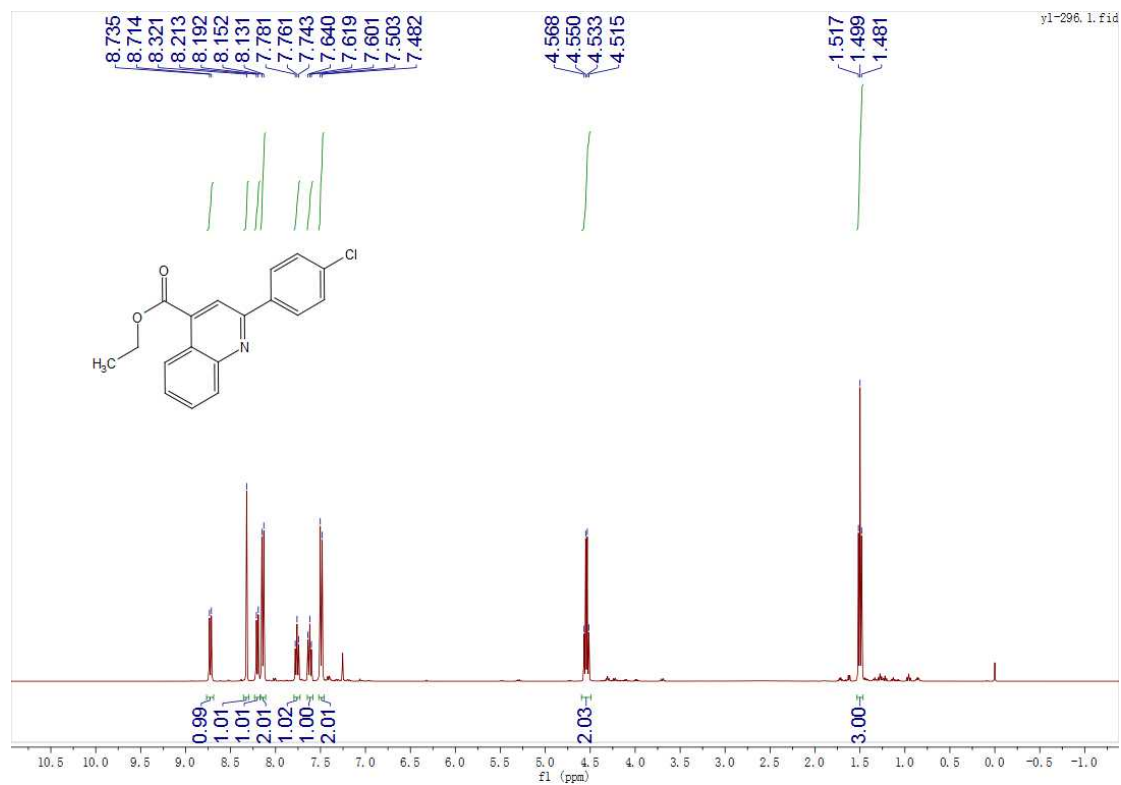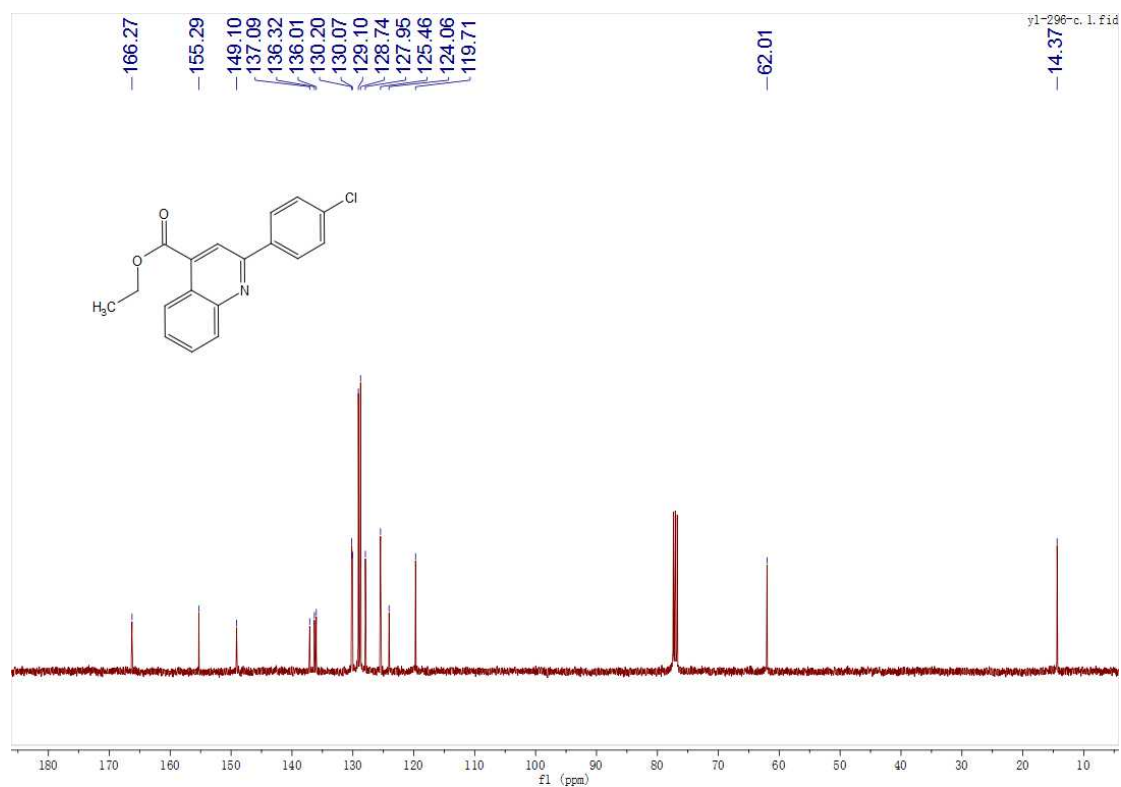

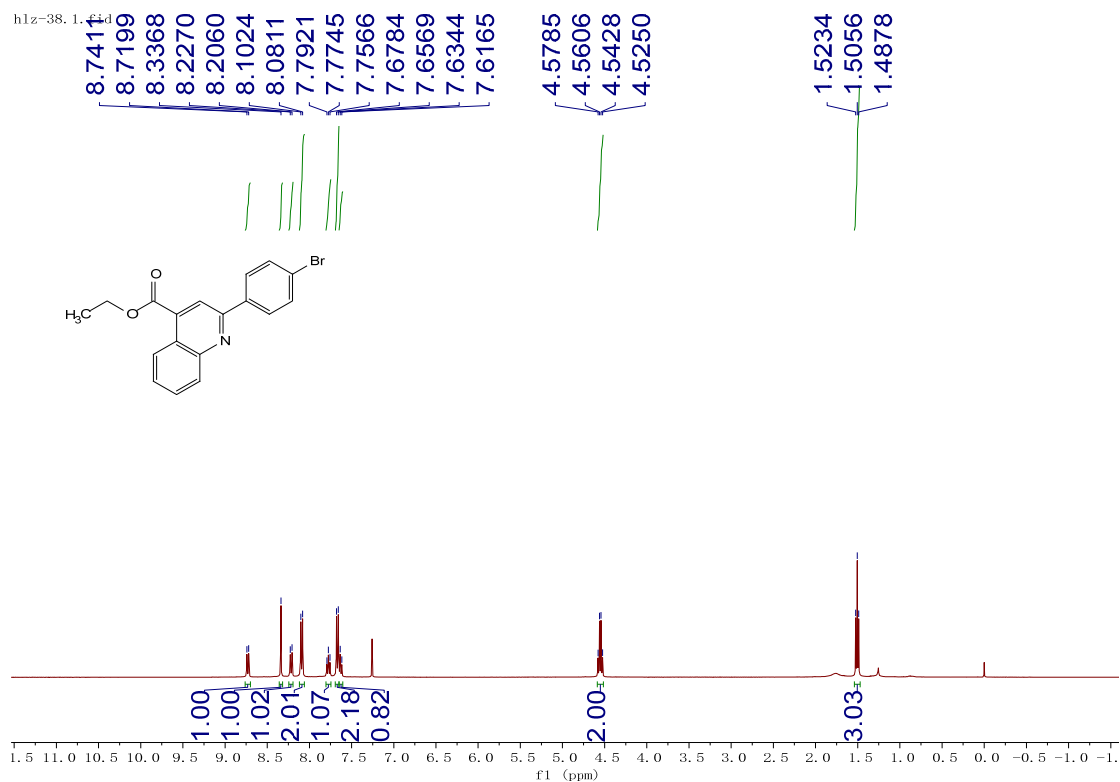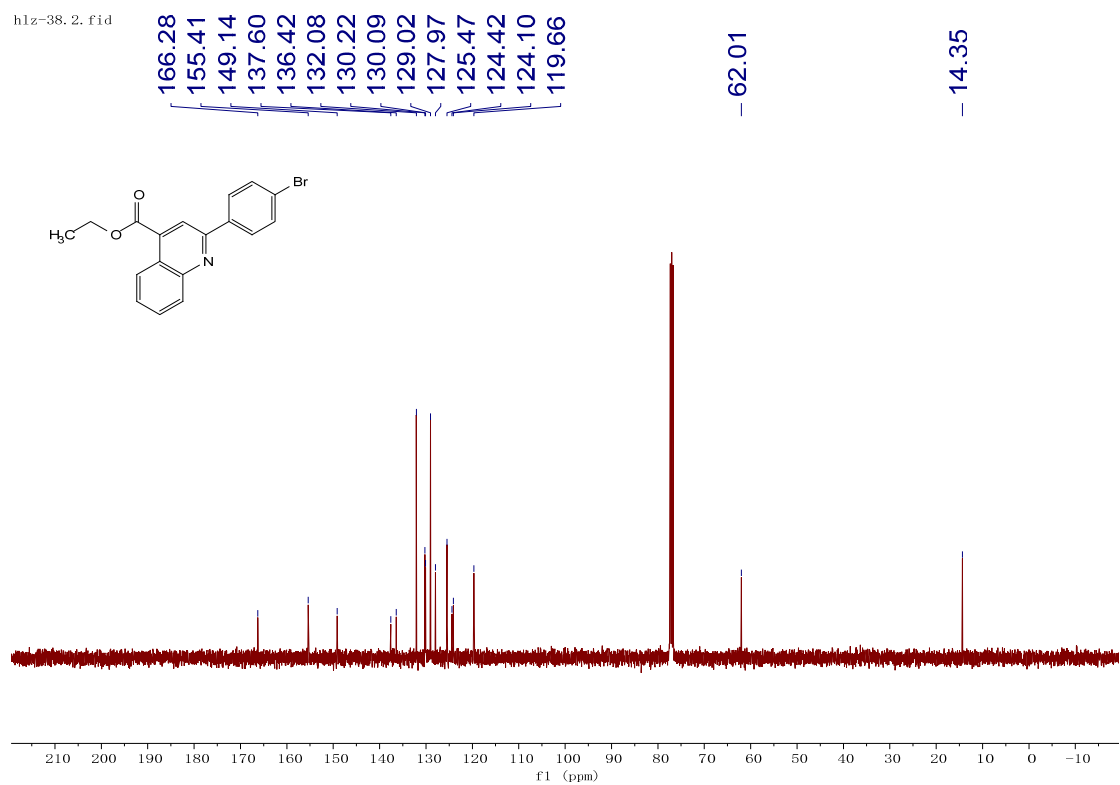

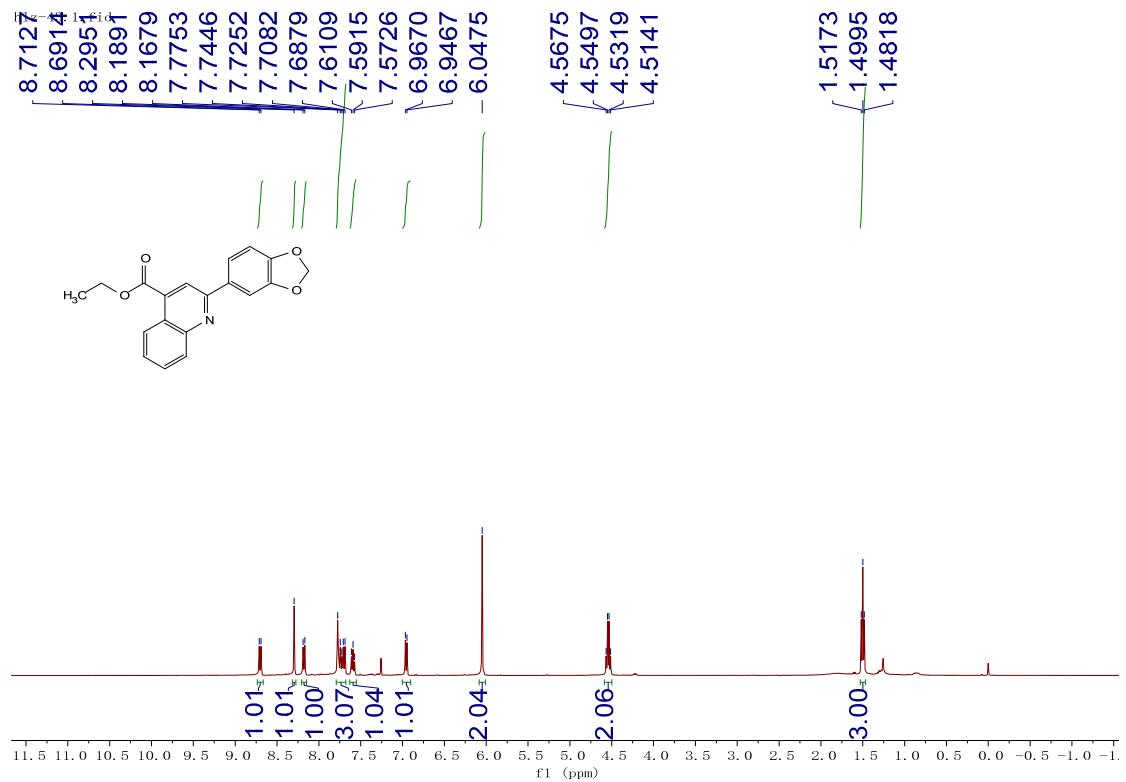

<sup>1</sup>H NMR spectrum of 4r

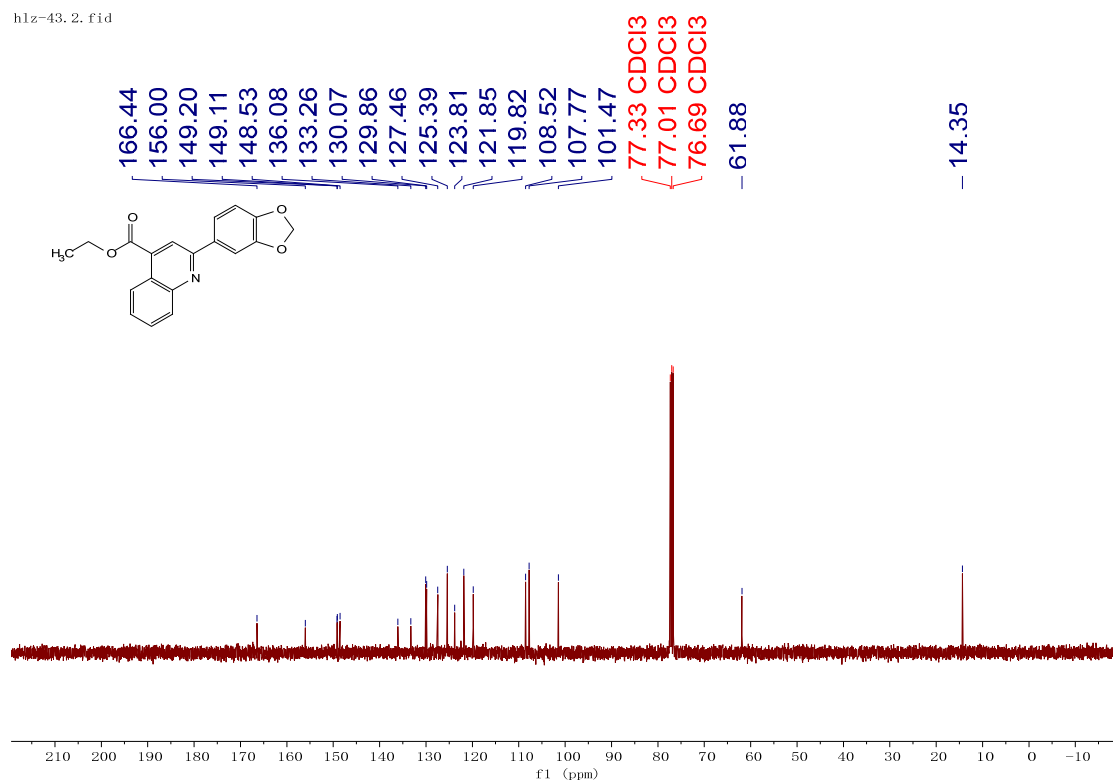

<sup>13</sup>C NMR spectrum of 4r

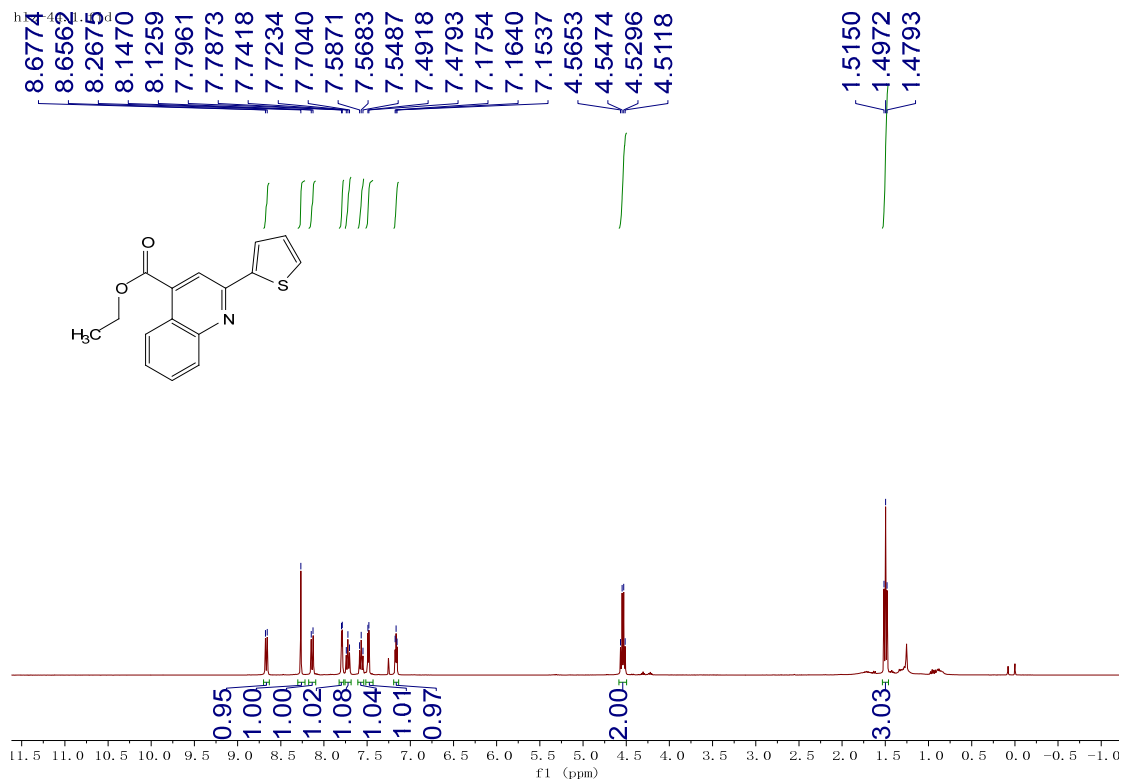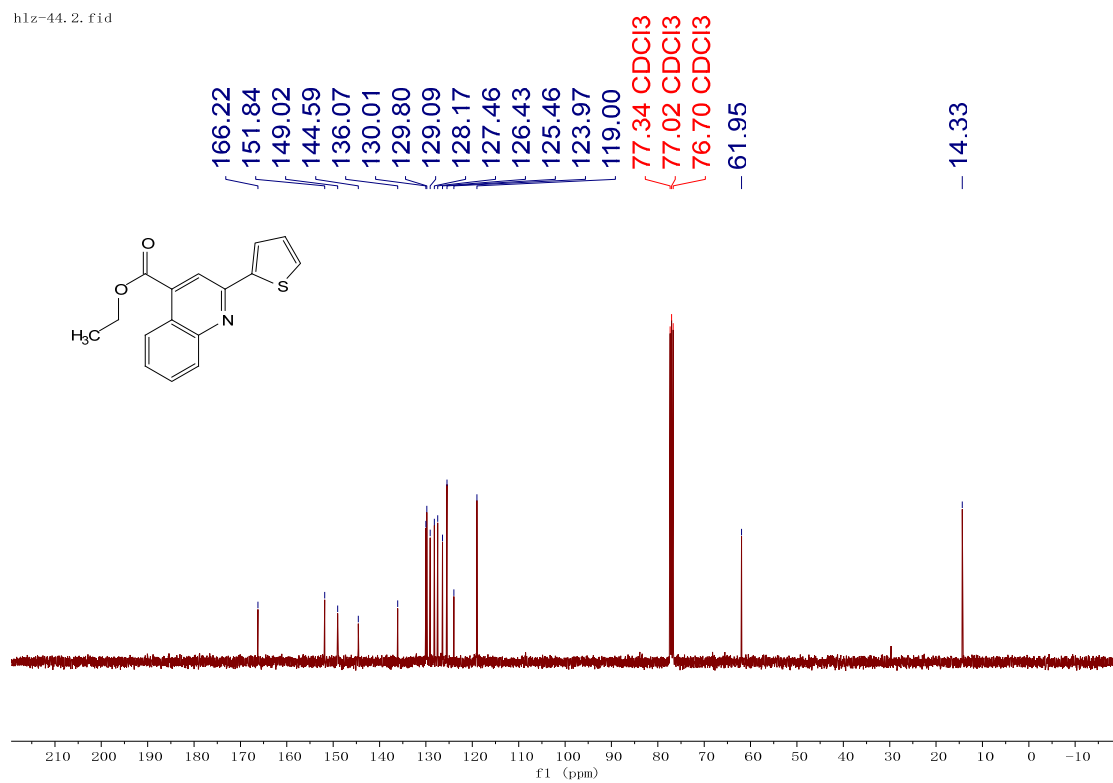

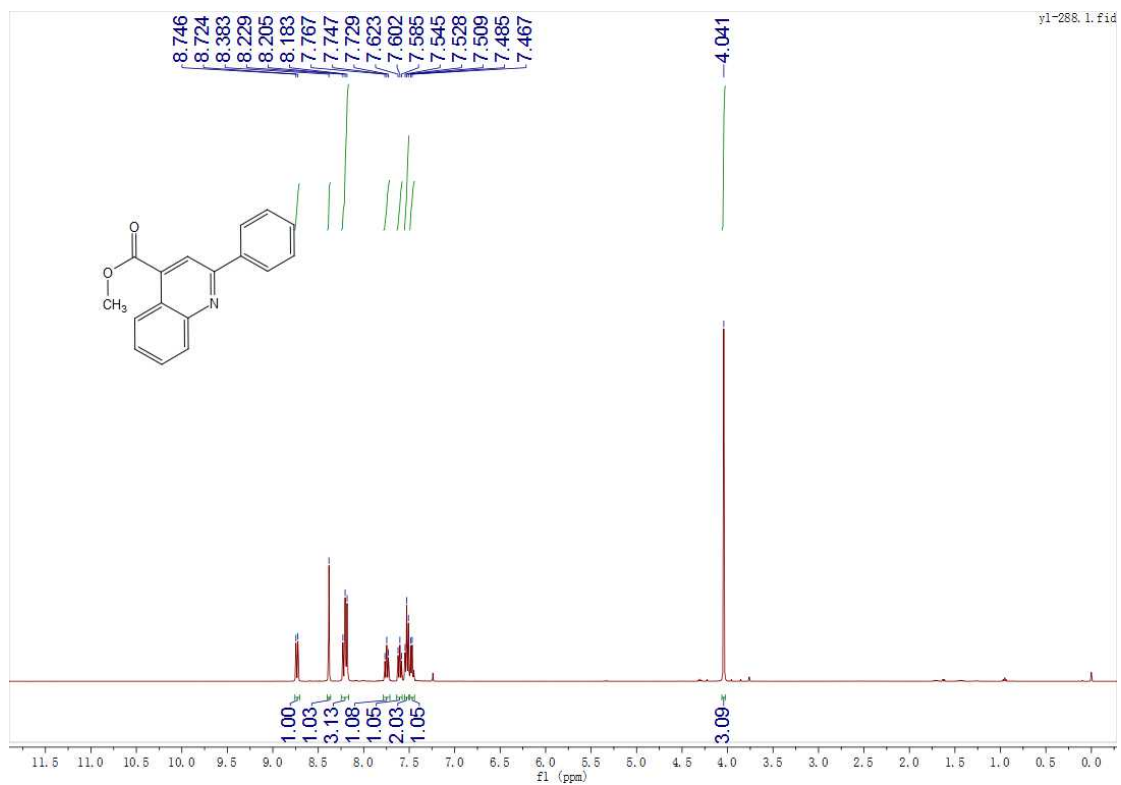

**<sup>1</sup>H NMR spectrum of 4t**

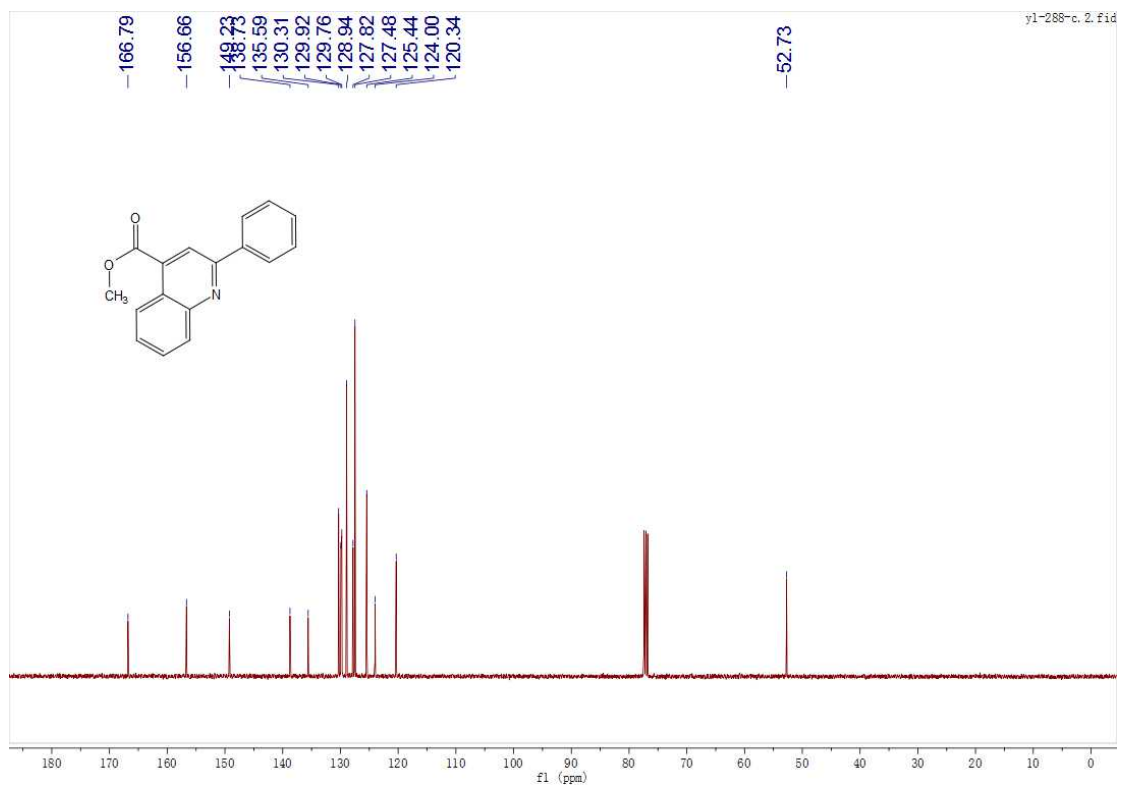

**<sup>13</sup>C NMR spectrum of 4t**

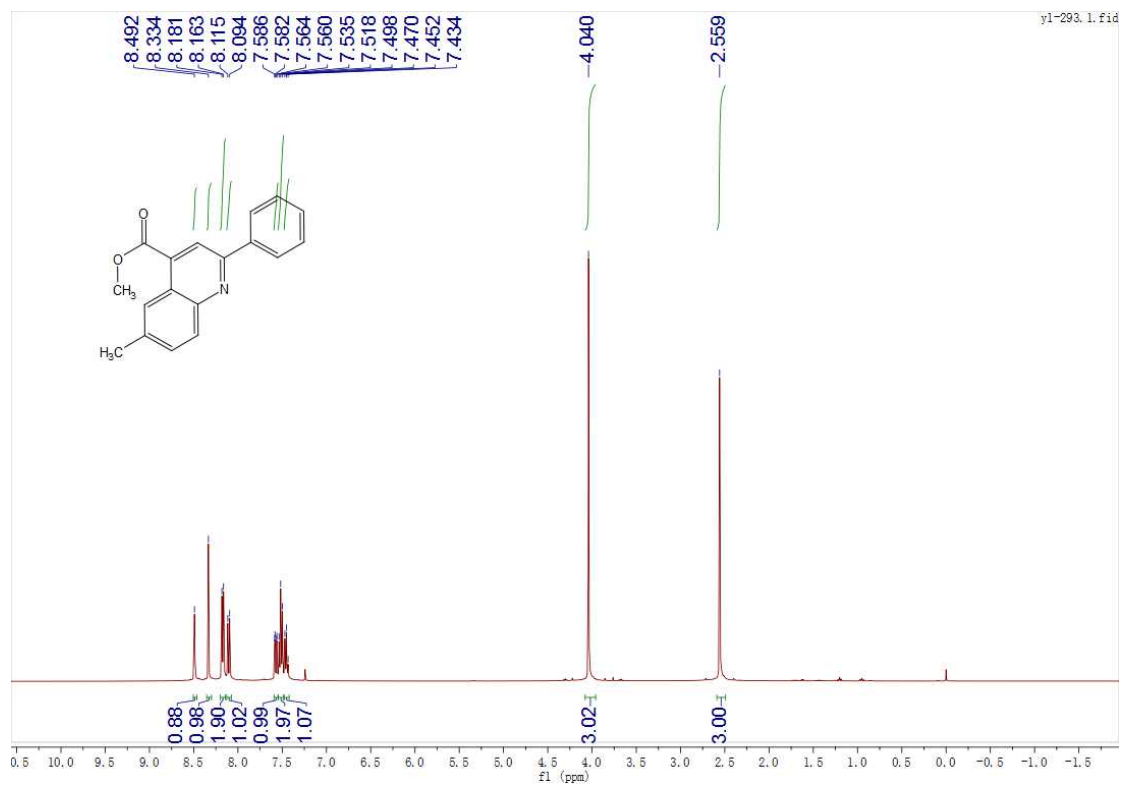

<sup>1</sup>H NMR spectrum of 4u

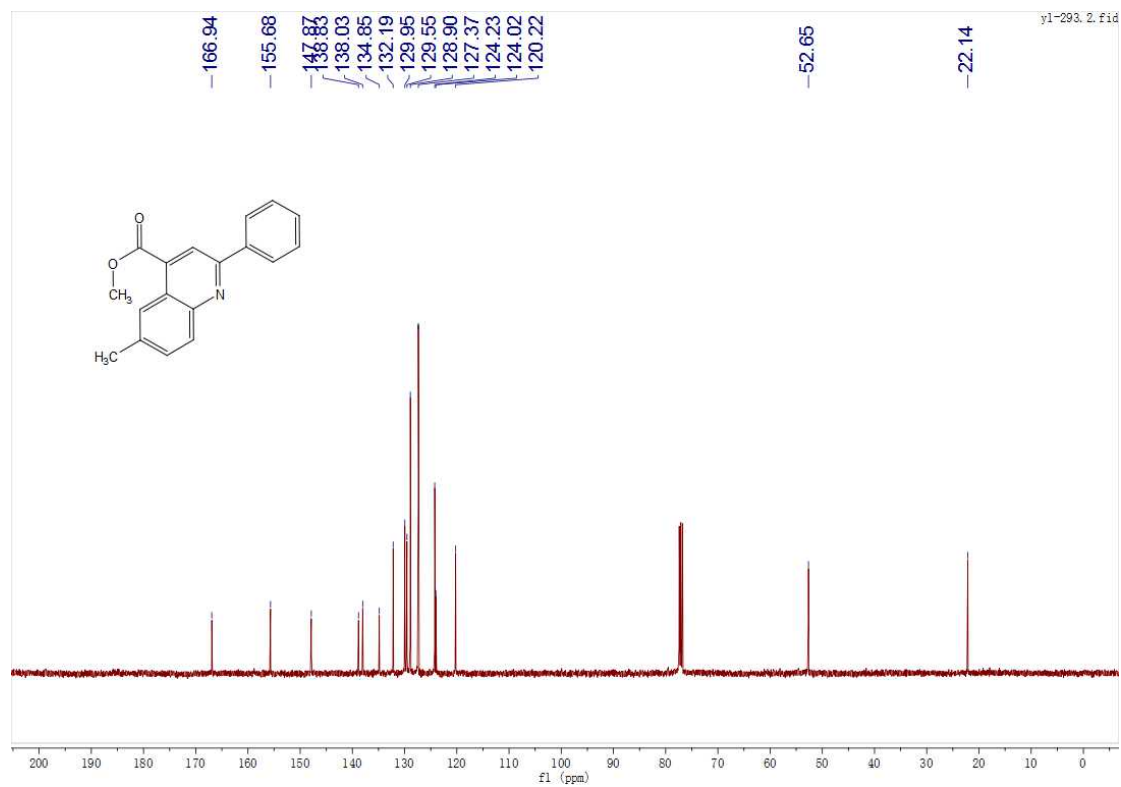

<sup>13</sup>C NMR spectrum of 4u



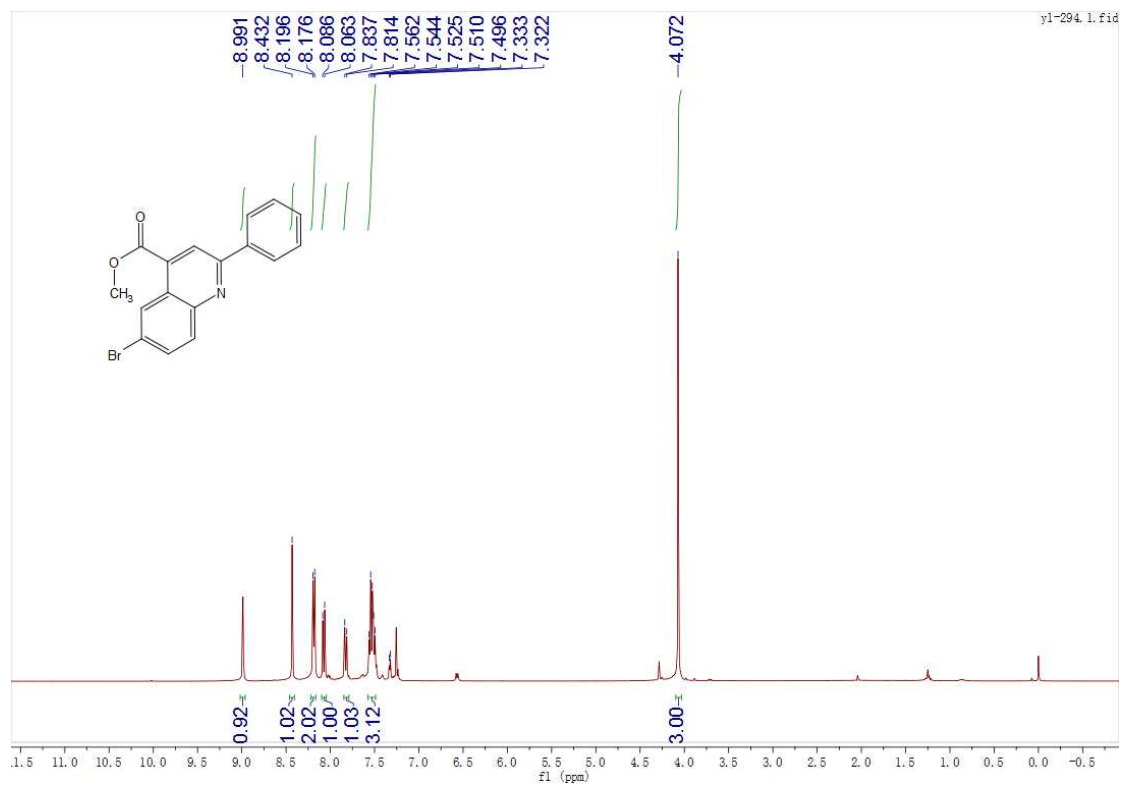

**<sup>1</sup>H NMR spectrum of 4v**

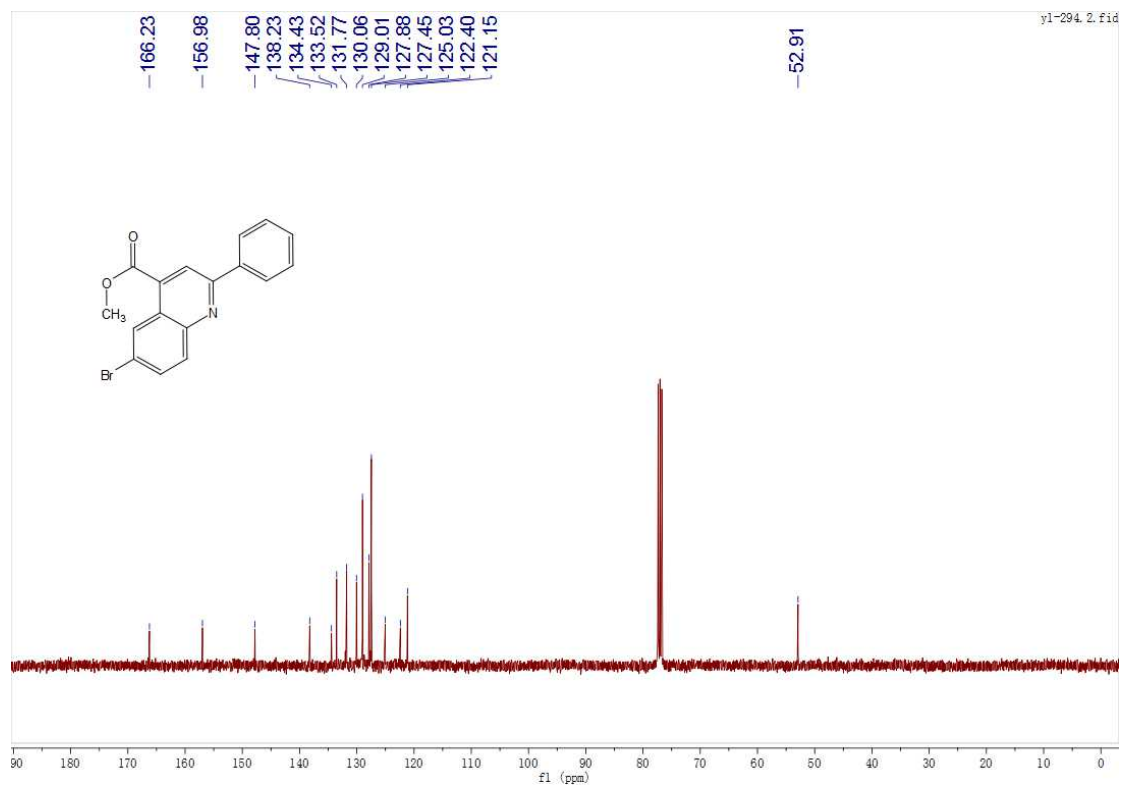

**<sup>13</sup>C NMR spectrum of 4v**

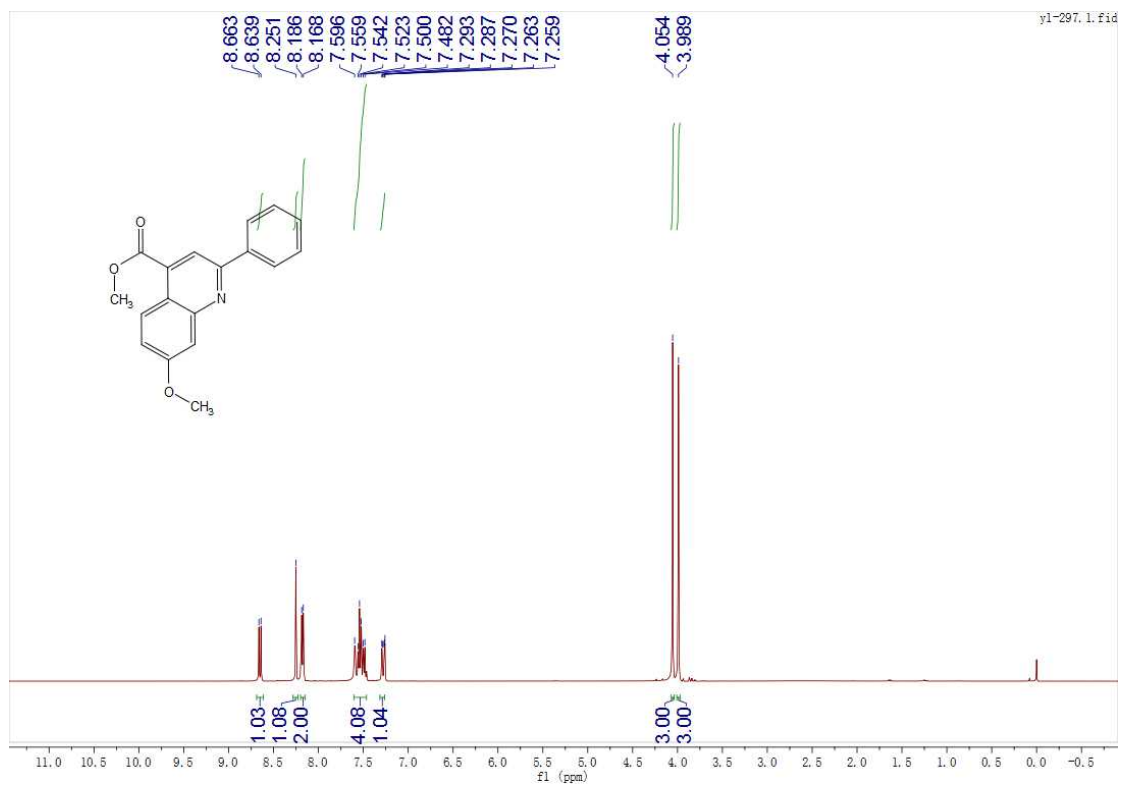

**<sup>1</sup>H NMR spectrum of 4w**

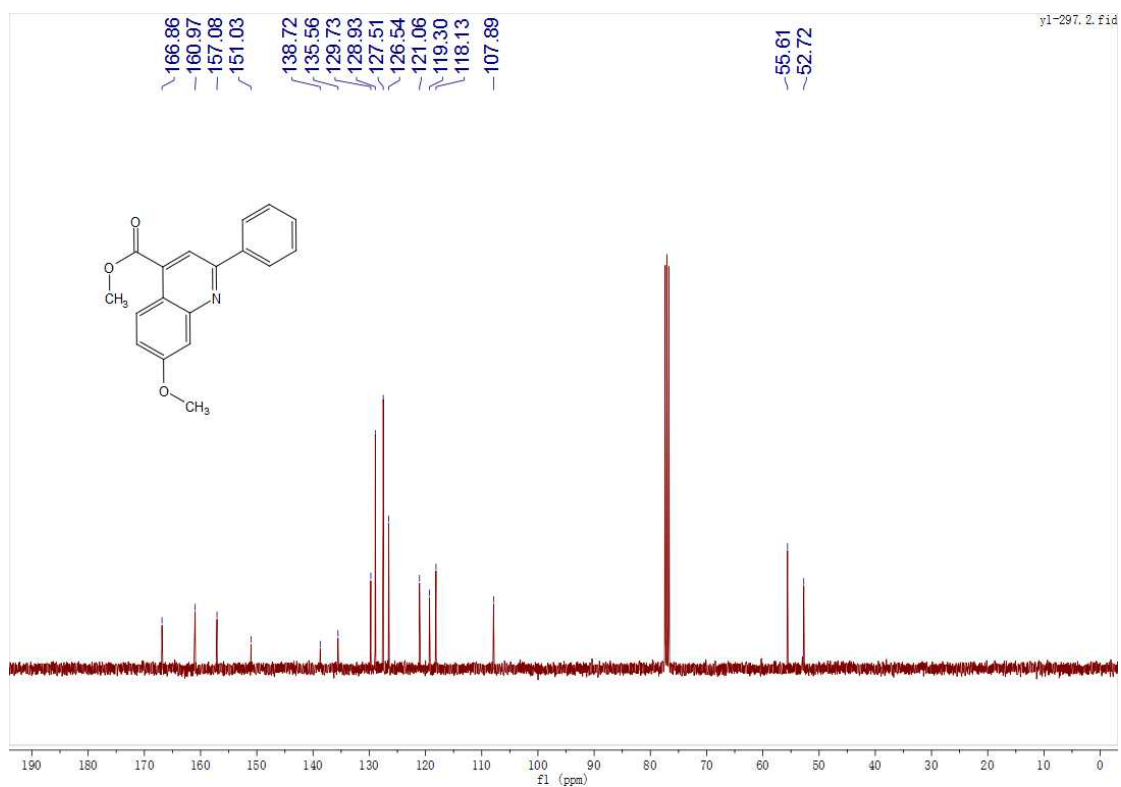

**<sup>13</sup>C NMR spectrum of 4w**

hlz-35.1.fid

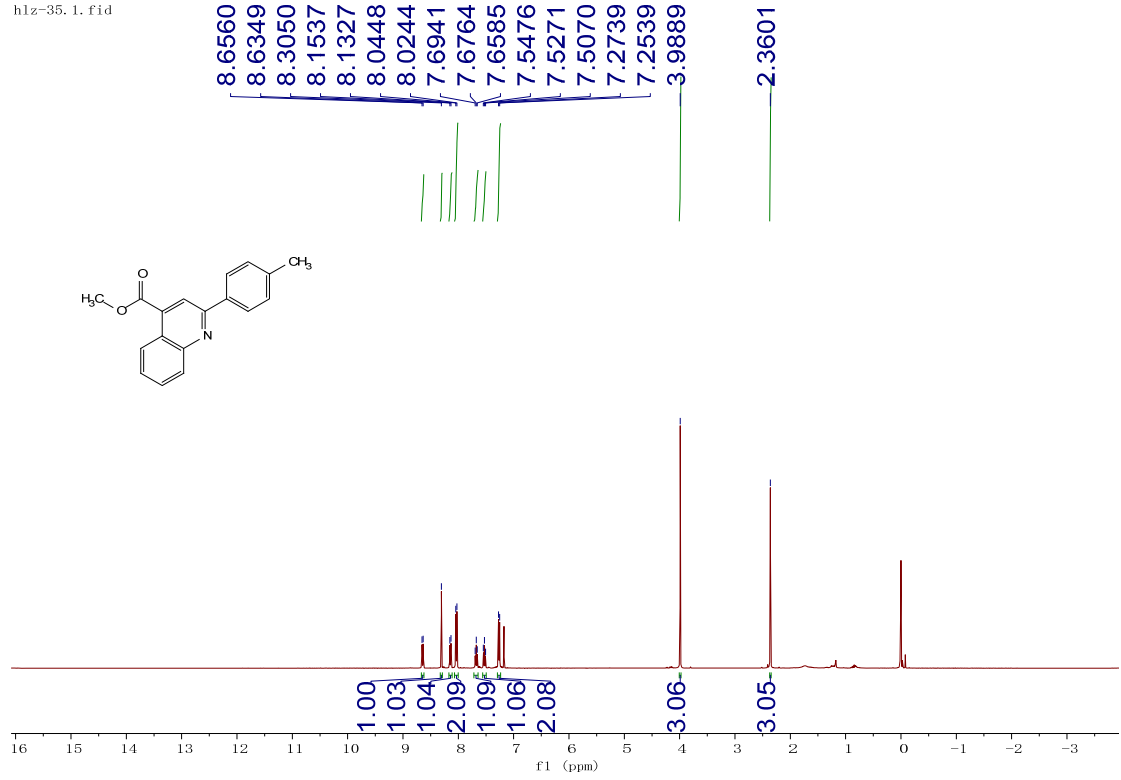

**<sup>1</sup>H NMR spectrum of 4x**

hlz-35.2.fid

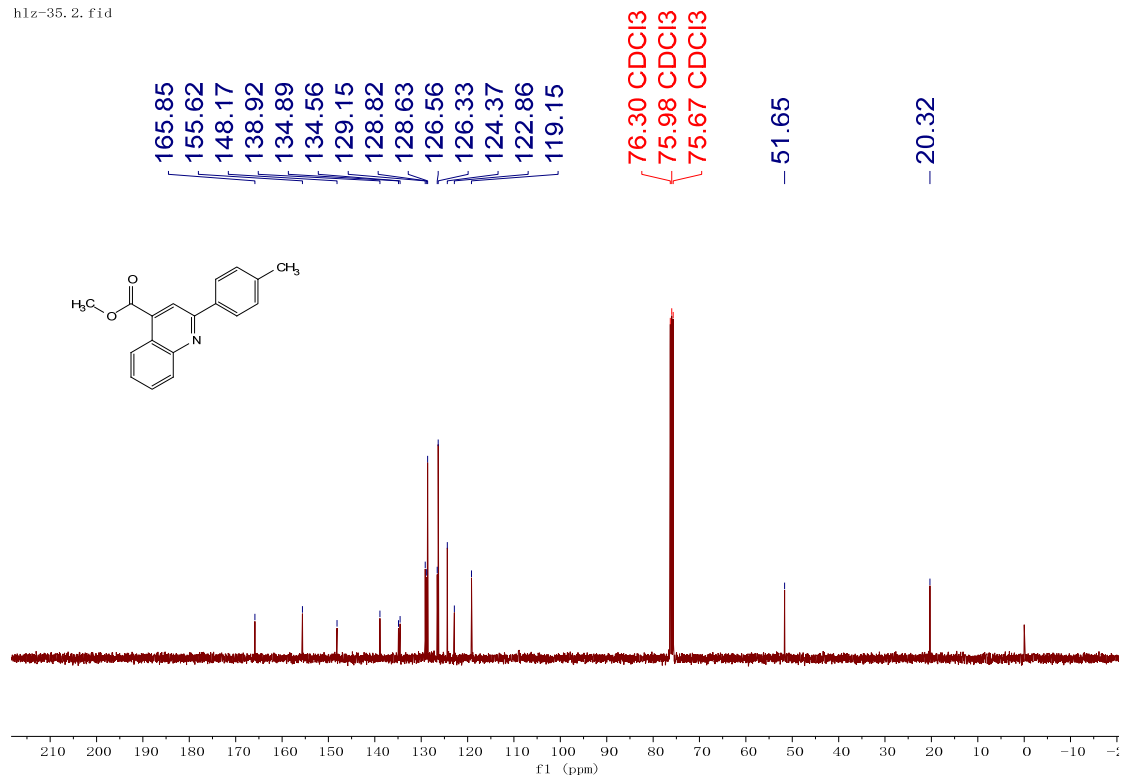

**<sup>13</sup>C NMR spectrum of 4x**

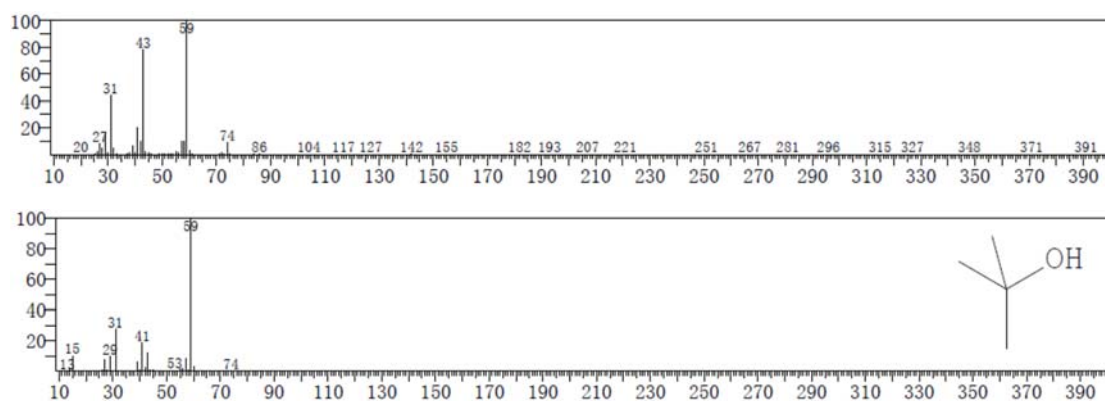

**Figure S1** The GC-MS spectra of the *t*-BuOH in the reaction mixture and standard *t*-BuOH

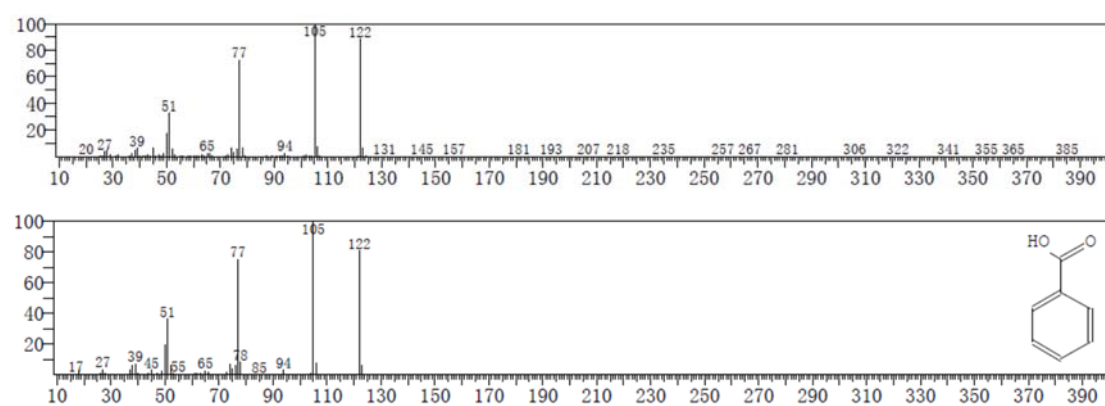

**Figure S2** The GC-MS spectra of the PhCO<sub>2</sub>H in the reaction mixture and standard PhCO<sub>2</sub>H
